# Supplementary material for: Genome-wide identification of miRNAs and lncRNAs in Cajanus cajan
Source: PubMed Central journal article supplement (PMC5688659; doi:10.1186/s12864-017-4232-2), 2017-11-15
Supplement: 12864_2017_4232_MOESM1_ESM.pdf [file 12864_2017_4232_MOESM1_ESM.pdf]

**Table S1 - Predicted miRNAs of *C. cajan*.**

| Family | Member miRNA(s) | Mature Sequence          | SSR <sup>a</sup> | LM <sup>b</sup> | LP <sup>c</sup> | AU <sup>d</sup> | MFEI <sup>e</sup> | Npb <sup>f</sup> | NQ <sup>g</sup> | ND <sup>h</sup> | R <sup>i</sup> |
|--------|-----------------|--------------------------|------------------|-----------------|-----------------|-----------------|-------------------|------------------|-----------------|-----------------|----------------|
| 156    | cca-miR156a     | GGUGUCAGAGAGAGAAUUGAG    | AGA              | 21              | 158             | 70.89           | 0.49              | 0.27             | 0.43            | 0.14            | 3.80           |
|        | cca-miR156b     | CAGAAGAGAGAGAGCACAA      |                  | 19              | 435             | 57.93           | 0.58              | 0.31             | 0.54            | 0.16            | 3.45           |
|        | cca-miR156c     | UAUGAUAGAAAGAGAGAGAGC    |                  | 21              | 239             | 66.95           | 0.53              | 0.27             | 0.54            | 0.16            | 4.60           |
|        | cca-miR156d     | UGAUGACAGAAGUAUAGAGAGC   |                  | 22              | 126             | 61.90           | 0.96              | 0.35             | 0.15            | 0.05            | 3.17           |
|        | cca-miR156e     | UGUGCUUUCUAUCUUCUGUCA    |                  | 22              | 108             | 62.04           | 1.01              | 0.32             | 0.10            | 0.04            | 2.78           |
|        | cca-miR156f     | GCUGACAGAUAGAGAAGUGAGC   |                  | 22              | 132             | 53.03           | 0.94              | 0.35             | 0.07            | 0.02            | 3.03           |
|        | cca-miR156g     | GCUCACUUCUCUAUCUGUCAGC   |                  | 22              | 103             | 49.51           | 1.18              | 0.41             | 0.04            | 0.02            | 2.91           |
| 158    | cca-miR158a     | CUUUGUCCACAAUUUUGGAA     | UGU              | 20              | 60              | 76.67           | 0.41              | 0.33             | 0.44            | 0.15            | 5.00           |
|        | cca-miR158b     | CCAAAAUUGUAGACAAA        |                  | 17              | 91              | 63.74           | 0.42              | 0.31             | 0.26            | 0.09            | 6.59           |
| 159    | cca-miR159a     | GAGCUCCUUGAAGUCCAAA      | UUG              | 19              | 109             | 55.96           | 0.74              | 0.30             | 0.14            | 0.05            | 3.67           |
|        | cca-miR159b     | UUGGAUCGAAUGGAGCUCCA     |                  | 20              | 91              | 56.04           | 0.52              | 0.34             | 0.28            | 0.09            | 3.30           |
|        | cca-miR159c     | UUUGGUUUGAAGGGGGCUCUG    |                  | 21              | 405             | 58.77           | 0.61              | 0.31             | 0.37            | 0.12            | 3.95           |
|        | cca-miR159d     | AACAGAUGCUGCAGCAGCUG     |                  | 20              | 357             | 49.86           | 0.68              | 0.31             | 0.40            | 0.12            | 4.48           |
| 160    | cca-miR160a     | AAUGGCAUACAGGGAGCCAGGCA  | AUG              | 23              | 105             | 50.48           | 1.08              | 0.36             | 0.02            | 0.01            | 5.71           |
|        | cca-miR160b     | UGCCUGGCUCUCCUGUAUGCCAUU |                  | 23              | 113             | 53.98           | 1.11              | 0.38             | 0.05            | 0.02            | 6.19           |
| 161    | cca-miR161a     | UAGUCACUUUCAAUUCAUU      | UUU              | 19              | 139             | 63.31           | 0.67              | 0.30             | 0.34            | 0.11            | 4.32           |
|        | cca-miR161b     | UCAAUACAUUGAAACUGACU     |                  | 20              | 143             | 75.52           | 0.59              | 0.27             | 0.30            | 0.09            | 2.80           |
| 162    | cca-miR162c     | UGGAGGUAGCGGUUCAUCGAUC   | AUC              | 22              | 504             | 70.83           | 0.58              | 0.26             | 0.42            | 0.12            | 3.37           |
|        | cca-miR162d     | UCGAUAAACCUCUGCAUCCAG    |                  | 21              | 131             | 58.02           | 0.83              | 0.36             | 0.10            | 0.04            | 3.82           |
| 164    | cca-miR164e     | UGGAGAAGCAGGGCACUUGCU    | GCA              | 21              | 119             | 50.42           | 0.60              | 0.32             | 0.24            | 0.08            | 3.36           |
|        | cca-miR164f     | UGCACGUGCUCUCCUUUCCA     |                  | 21              | 112             | 58.04           | 0.79              | 0.27             | 0.04            | 0.01            | 3.57           |
| 166    | cca-miR166g     | GGGAAUGAAGCCUGGUCCGA     | UUC              | 20              | 119             | 49.58           | 0.84              | 0.34             | 0.14            | 0.05            | 2.52           |
|        | cca-miR166h     | UCGGACCAGGCUUCAUCCCC     |                  | 21              | 234             | 58.97           | 0.52              | 0.28             | 0.28            | 0.08            | 6.41           |
|        | cca-miR166i     | CCUCGAGCCAGACAACAUCC     |                  | 21              | 116             | 52.59           | 0.84              | 0.35             | 0.12            | 0.05            | 2.59           |
|        | cca-miR166j     | GGAAUGUUGUUUGGCUCGAGG    |                  | 21              | 228             | 65.79           | 0.90              | 0.37             | 0.07            | 0.03            | 3.95           |
|        | cca-miR166k     | AUCUUGGAUCAUCCUUCAUU     |                  | 20              | 412             | 60.92           | 0.70              | 0.30             | 0.29            | 0.09            | 2.91           |

|     |             |                          |     |    |     |       |      |      |      |      |      |
|-----|-------------|--------------------------|-----|----|-----|-------|------|------|------|------|------|
| 167 | cca-miR167a | AAAUGAUGCUGUCAUUCAUGAU   | UGA | 22 | 260 | 62.69 | 0.71 | 0.32 | 0.34 | 0.12 | 5.00 |
|     | cca-miR167b | AUGAGGAUGUUAUGCAUGAUC    |     | 21 | 190 | 75.79 | 0.94 | 0.35 | 0.37 | 0.11 | 5.79 |
|     | cca-miR167c | GAUCAUGUUCGGGCUUCAC      |     | 19 | 76  | 51.32 | 0.62 | 0.30 | 0.11 | 0.05 | 2.63 |
|     | cca-miR167d | GAUCUUGCUGUAGCAGCCUCAC   |     | 22 | 473 | 62.58 | 0.65 | 0.33 | 0.44 | 0.14 | 2.54 |
|     | cca-miR167e | GGUGAAGCAAGCAUAUGAU      |     | 19 | 478 | 60.67 | 0.62 | 0.30 | 0.38 | 0.12 | 3.35 |
|     | cca-miR167f | CAGUUGAAGCUGCCAGCAUGAU   |     | 22 | 83  | 56.63 | 1.23 | 0.37 | 0.02 | 0.01 | 4.82 |
|     | cca-miR167g | AUCAUGUGGGAGUUUCAU       |     | 19 | 287 | 63.41 | 0.59 | 0.31 | 0.42 | 0.14 | 2.79 |
|     | cca-miR167h | UAAGAUCAUGCUGGCAGCUUCA   |     | 22 | 136 | 68.38 | 1.04 | 0.36 | 0.06 | 0.03 | 3.68 |
| 168 | cca-miR168a | GAUCCCGCCUUGCAUCAACUGAAU | CGG | 24 | 127 | 40.94 | 0.87 | 0.40 | 0.10 | 0.04 | 4.72 |
|     | cca-miR168b | UCGCUUGGUGCAGGUCGGGA     |     | 20 | 131 | 41.98 | 0.86 | 0.39 | 0.09 | 0.04 | 4.58 |
| 169 | cca-miR169a | GGCAAGUUUCUCUUGGCUACA    | UUG | 21 | 113 | 57.52 | 1.11 | 0.38 | 0.06 | 0.02 | 7.08 |
|     | cca-miR169b | CAGCCAAGGGUGAUUUGCCGG    |     | 21 | 124 | 57.26 | 1.10 | 0.38 | 0.06 | 0.02 | 6.45 |
|     | cca-miR169c | UGAGCCGGGAUGGCUUGCCGGCA  |     | 23 | 109 | 51.38 | 1.10 | 0.39 | 0.16 | 0.06 | 3.67 |
|     | cca-miR169d | CCGGCAAGUCAUUCUUGGCUC    |     | 21 | 72  | 59.72 | 1.08 | 0.29 | 0.07 | 0.03 | 2.78 |
|     | cca-miR169e | CAGGCAAUCAUCCUUGGCUU     |     | 21 | 471 | 63.91 | 0.65 | 0.30 | 0.40 | 0.12 | 4.25 |
|     | cca-miR169f | UGAGCCAAGGAUGAGUUGCCU    |     | 21 | 492 | 55.08 | 0.59 | 0.30 | 0.36 | 0.11 | 2.64 |
|     | cca-miR169g | UAGCCAAGGGACUGCACAUG     |     | 21 | 181 | 64.09 | 0.81 | 0.33 | 0.18 | 0.07 | 3.31 |
|     | cca-miR169h | AGCCAAUAAUGGCUUGCCU      |     | 19 | 120 | 40.83 | 0.78 | 0.38 | 0.13 | 0.05 | 2.50 |
|     | cca-miR169i | UAGCCAUGUAUGAUUUGCCUG    |     | 21 | 497 | 61.97 | 0.53 | 0.29 | 0.51 | 0.15 | 3.22 |
| 171 | cca-miR171a | UCUGAUUGAACC GCACCAAUA   | UUG | 21 | 100 | 60.00 | 0.75 | 0.35 | 0.04 | 0.02 | 3.00 |
|     | cca-miR171b | UGAUUGAGCCGUGCCAAUAUC    |     | 21 | 114 | 57.89 | 0.88 | 0.32 | 0.13 | 0.04 | 3.51 |
|     | cca-miR171c | GAUAUUGGCACGGCUCAAUCA    |     | 21 | 468 | 66.88 | 0.61 | 0.31 | 0.40 | 0.13 | 2.99 |
|     | cca-miR171d | UAUUGGUCCGGUUCAAUGAGA    |     | 21 | 79  | 54.43 | 0.91 | 0.34 | 0.06 | 0.02 | 2.53 |
|     | cca-miR171e | UGAGCCGCUCCAAUAUCAC      |     | 19 | 500 | 46.20 | 0.65 | 0.34 | 0.45 | 0.15 | 4.00 |
|     | cca-miR171f | AGAUAUUGAAGUUGCUCAAUC    |     | 21 | 122 | 65.57 | 0.69 | 0.33 | 0.09 | 0.03 | 4.92 |
|     | cca-miR171g | CGAGCCGAAUCAUAUCACUC     |     | 21 | 98  | 59.18 | 0.78 | 0.32 | 0.04 | 0.02 | 4.08 |
|     | cca-miR171h | GAGUAAUAUUGGUUCGGCUCG    |     | 21 | 104 | 60.58 | 0.88 | 0.37 | 0.18 | 0.07 | 2.88 |
|     | cca-miR171i | CGUGAUAUUGGUCCGGCUCAU    |     | 21 | 102 | 59.80 | 1.03 | 0.37 | 0.05 | 0.02 | 3.92 |
|     | cca-miR171j | UUAUUGAAUCGGACCAAUAUC    |     | 21 | 97  | 56.70 | 0.51 | 0.32 | 0.10 | 0.04 | 5.15 |
|     | cca-miR171k | UUUGAUGGAACCAUGCCAA      |     | 19 | 383 | 68.41 | 0.75 | 0.35 | 0.52 | 0.15 | 4.18 |
|     | cca-miR171l | AUAAGAAAGCAGUGAUCAAA     |     | 20 | 363 | 72.73 | 0.71 | 0.31 | 0.23 | 0.07 | 2.75 |

|     |             |                          |     |    |     |       |      |      |      |      |      |
|-----|-------------|--------------------------|-----|----|-----|-------|------|------|------|------|------|
|     | cca-miR171m | UGAGAUAUUGACGCGGCUCAA    |     | 21 | 113 | 57.52 | 0.84 | 0.35 | 0.08 | 0.03 | 3.54 |
|     | cca-miR171n | UUGGUGAGGUUCAAUCCGA      |     | 19 | 315 | 63.17 | 0.79 | 0.33 | 0.14 | 0.05 | 2.86 |
| 172 | cca-miR172a | AUGUAGCAUCAUCAAGAUUCA    | AUG | 21 | 160 | 59.38 | 0.98 | 0.36 | 0.18 | 0.06 | 5.00 |
|     | cca-miR172b | UGAAUUAUUGAAGAUGCU       |     | 17 | 465 | 40.86 | 0.81 | 0.36 | 0.44 | 0.15 | 2.80 |
|     | cca-miR172c | GGAAUCUUGAUGAUGCUGCAGCAG |     | 24 | 128 | 57.81 | 1.09 | 0.39 | 0.08 | 0.04 | 3.91 |
|     | cca-miR172d | UGUGAAUCUUGAUGCUGCU      |     | 19 | 175 | 60.00 | 0.97 | 0.33 | 0.14 | 0.04 | 2.86 |
| 319 | cca-miR319a | UUGGUCUGAAGGGUUCUU       | CUU | 19 | 73  | 49.32 | 0.47 | 0.33 | 0.24 | 0.07 | 2.74 |
|     | cca-miR319b | AGAGCUUUCUUCAGUCCACUC    |     | 21 | 494 | 65.38 | 0.64 | 0.34 | 0.27 | 0.09 | 3.44 |
|     | cca-miR319c | GGAGUUCUUGCAGCCCAAAG     |     | 21 | 110 | 56.36 | 1.04 | 0.38 | 0.03 | 0.01 | 6.36 |
|     | cca-miR319d | GGGAGCUCCCUUCAGUCCAAG    |     | 21 | 194 | 61.34 | 0.87 | 0.30 | 0.07 | 0.02 | 2.58 |
|     | cca-miR319e | UGGACUGAAGGGGAGCUCCUUC   |     | 22 | 82  | 46.34 | 0.96 | 0.39 | 0.12 | 0.05 | 7.32 |
| 390 | cca-miR319f | GGAUGAAUGAGUCGGCAGC      | AUC | 19 | 179 | 58.10 | 0.87 | 0.32 | 0.07 | 0.03 | 3.35 |
|     | cca-miR390a | UGAAACUCAGGAUAGAUAGCG    |     | 21 | 90  | 53.33 | 1.12 | 0.37 | 0.01 | 0.01 | 3.33 |
|     | cca-miR390b | AAGCUCAGGAGGGAUAGCACC    |     | 21 | 103 | 57.28 | 1.00 | 0.39 | 0.05 | 0.02 | 3.88 |
| 393 | cca-miR390c | GGCGCUAUCUAUCCUGAGCUU    | AUC | 21 | 120 | 58.33 | 0.94 | 0.35 | 0.05 | 0.02 | 4.17 |
|     | cca-miR393a | AAGGGAUAGCAUGAUCCCAA     |     | 21 | 110 | 59.09 | 1.10 | 0.34 | 0.14 | 0.05 | 3.64 |
|     | cca-miR393b | UUUGGGAUCAUGCUAUCCCUU    |     | 21 | 100 | 60.00 | 1.21 | 0.35 | 0.08 | 0.03 | 6.00 |
|     | cca-miR393c | GGAUCAAUUGCGAUCCCUUUGGA  |     | 22 | 113 | 58.41 | 1.06 | 0.33 | 0.14 | 0.05 | 3.54 |
| 394 | cca-miR393d | UCCAAAGGGAUCGCAUUGAUCC   | UCU | 22 | 115 | 57.39 | 1.16 | 0.36 | 0.07 | 0.02 | 5.22 |
|     | cca-miR394a | AGGUGGGCAUACUGCCAACU     |     | 20 | 475 | 61.05 | 0.61 | 0.27 | 0.26 | 0.08 | 4.84 |
| 395 | cca-miR394b | UUGGCAUUCUGUCCACCUCCAU   | ACU | 22 | 157 | 53.50 | 0.89 | 0.34 | 0.08 | 0.03 | 3.82 |
|     | cca-miR395a | GGAGUCCUCCAAACACUUCA     |     | 21 | 114 | 60.53 | 0.86 | 0.32 | 0.17 | 0.06 | 2.63 |
|     | cca-miR395b | CUGAAGUGUUUGGGGGAACUCC   |     | 22 | 119 | 59.66 | 1.02 | 0.34 | 0.08 | 0.03 | 4.20 |
| 396 | cca-miR395c | CAAUGAAGCGUUAAGGGGAAC    | CUU | 21 | 79  | 54.43 | 0.69 | 0.28 | 0.08 | 0.03 | 2.53 |
|     | cca-miR396a | GUUCAAUAAAGCUGUGGGAAG    |     | 21 | 123 | 52.85 | 0.69 | 0.28 | 0.17 | 0.06 | 4.07 |
|     | cca-miR396b | CUUCCCACAACUUAUUG        |     | 18 | 155 | 58.06 | 0.62 | 0.34 | 0.28 | 0.09 | 2.58 |
|     | cca-miR396c | UCCACAGCUUUGUUGCACUU     |     | 21 | 406 | 66.75 | 0.51 | 0.27 | 0.35 | 0.11 | 2.96 |
|     | cca-miR396d | GCAUAAGAAGUUCAAGAA       |     | 18 | 97  | 64.95 | 1.18 | 0.38 | 0.09 | 0.03 | 3.09 |
|     | cca-miR396e | UCCACAGGCUUUCUUGAACGG    |     | 21 | 225 | 51.56 | 0.58 | 0.33 | 0.26 | 0.08 | 3.11 |
| 397 | cca-miR396f | UCUCCCACAGCUUUCUUGAGC    | CUU | 21 | 107 | 52.34 | 0.91 | 0.32 | 0.14 | 0.05 | 3.74 |
| 397 | cca-miR397a | AUUGAGUGCAGCAUUGAUGAC    | UGA | 21 | 461 | 67.68 | 0.52 | 0.27 | 0.46 | 0.13 | 3.47 |

|     |             |                        |     |    |     |       |      |      |      |      |      |
|-----|-------------|------------------------|-----|----|-----|-------|------|------|------|------|------|
|     | cca-miR397b | CAUCAACGCUGCACUCAAUGA  |     | 21 | 133 | 60.15 | 0.87 | 0.35 | 0.20 | 0.07 | 6.02 |
| 398 | cca-miR398a | GGAGUGAAUCUGAGAACACAAG | UCA | 22 | 101 | 60.40 | 1.13 | 0.41 | 0.08 | 0.03 | 2.97 |
|     | cca-miR398b | UUGUGUUCUCAGGUCACCCCU  |     | 21 | 114 | 58.77 | 1.08 | 0.40 | 0.09 | 0.04 | 2.63 |
| 399 | cca-miR399a | GGGCUUCUCUUUCUUGGCAGG  | UGC | 21 | 104 | 59.62 | 1.08 | 0.33 | 0.10 | 0.04 | 3.85 |
|     | cca-miR399b | CUGCCAAUAGAGAAGUUGCCC  |     | 21 | 78  | 50.00 | 0.82 | 0.29 | 0.04 | 0.01 | 5.13 |
|     | cca-miR399c | CUGGGCAAUCUCCUUUGGCA   |     | 21 | 113 | 53.98 | 0.78 | 0.29 | 0.10 | 0.03 | 6.19 |
|     | cca-miR399d | UGCCAAAGGAGAUUUGCCUG   |     | 21 | 115 | 54.78 | 1.18 | 0.40 | 0.04 | 0.01 | 5.22 |
| 400 | cca-miR400a | UUCAUGACAUUAUUAUAAAG   | AUU | 19 | 56  | 73.21 | 0.86 | 0.34 | 0.04 | 0.02 | 3.57 |
|     | cca-miR400b | UCAUGAGAUUAUUCUAAGU    |     | 19 | 146 | 69.86 | 0.75 | 0.33 | 0.16 | 0.06 | 5.48 |
|     | cca-miR400c | GACUUAUAAAAUCUAAUGAA   |     | 21 | 505 | 74.85 | 0.60 | 0.28 | 0.37 | 0.11 | 5.74 |
| 403 | cca-miR403a | GUUUGUGCGUGAAUCUAA     | AUC | 18 | 80  | 60.00 | 1.22 | 0.35 | 0.02 | 0.01 | 2.50 |
| 408 | cca-miR408a | CAGGGGAACAGGCAGAGCAUG  | AGA | 21 | 98  | 48.98 | 0.78 | 0.34 | 0.15 | 0.05 | 3.06 |
|     | cca-miR408b | UGCACUGCCUCUUCUCCUGGCU |     | 21 | 110 | 50.00 | 0.85 | 0.35 | 0.11 | 0.03 | 2.73 |
| 414 | cca-miR414a | UCAUCGUCAUCAUCAUUGUCC  | CAU | 21 | 449 | 60.58 | 0.42 | 0.26 | 0.28 | 0.09 | 2.90 |
|     | cca-miR414b | GACGAUGAUGAUAAAGGAUG   |     | 19 | 416 | 71.88 | 0.77 | 0.31 | 0.23 | 0.07 | 3.13 |
| 417 | cca-miR417a | GAAUAUAGUGAAUUAGUUC    | AAU | 20 | 425 | 73.18 | 0.69 | 0.31 | 0.52 | 0.15 | 4.71 |
| 419 | cca-miR419a | AACAUCAUCAGCAUUCAUC    | AUG | 19 | 320 | 72.81 | 0.69 | 0.32 | 0.38 | 0.12 | 2.50 |
|     | cca-miR419b | UGAUGAAUGAUGAUGAUGUAU  |     | 21 | 409 | 69.68 | 0.71 | 0.33 | 0.44 | 0.14 | 4.40 |
| 437 | cca-miR437a | AAGUUAUAGAACUCUGACUU   | UUU | 20 | 75  | 61.33 | 0.80 | 0.33 | 0.04 | 0.01 | 4.00 |
|     | cca-miR437b | AAAGGUAGAGAUGUUUGACU   |     | 20 | 388 | 65.72 | 0.65 | 0.27 | 0.30 | 0.09 | 3.09 |
|     | cca-miR437c | AAAGUUUGAGAAGUUUGACU   |     | 20 | 436 | 66.51 | 0.64 | 0.28 | 0.34 | 0.10 | 3.44 |
| 444 | cca-miR444a | UGUUGCCUCAAGUUUGCUGC   | UGC | 20 | 138 | 63.77 | 0.73 | 0.30 | 0.22 | 0.07 | 4.35 |
| 476 | cca-miR476a | UAGUGAUCCUUCUUUCAA     | AUU | 20 | 501 | 65.87 | 0.68 | 0.31 | 0.31 | 0.10 | 3.39 |
| 477 | cca-miR477a | AGAGAAGCCAUUGAGAGAGA   | CUU | 20 | 141 | 55.32 | 0.51 | 0.28 | 0.30 | 0.11 | 2.84 |
|     | cca-miR477b | CUCUCCUCAUGUUGUUCUA    |     | 20 | 400 | 70.75 | 0.61 | 0.26 | 0.30 | 0.09 | 2.50 |
|     | cca-miR477c | UAGAAGAACUUGAGAGAGAG   |     | 20 | 421 | 64.85 | 0.65 | 0.30 | 0.33 | 0.10 | 3.09 |
|     | cca-miR477d | CUCUUUUUGAAAGGCUUCU    |     | 19 | 83  | 68.67 | 0.72 | 0.37 | 0.21 | 0.08 | 7.23 |
|     | cca-miR477e | UAGAAGCAUUUGCAGAAGAG   |     | 20 | 221 | 75.57 | 1.26 | 0.32 | 0.20 | 0.07 | 2.71 |
|     | cca-miR477f | CUCUCCUCAAGGGCUUCUC    |     | 20 | 119 | 52.10 | 0.86 | 0.34 | 0.07 | 0.03 | 2.52 |
|     | cca-miR477g | CUCUCUCUCAAAGGCCUCCA   |     | 20 | 135 | 51.85 | 0.74 | 0.33 | 0.12 | 0.04 | 2.96 |
|     | cca-miR477h | GGAAGCCAUUGAAGGAGAU    |     | 19 | 499 | 66.73 | 0.64 | 0.31 | 0.30 | 0.09 | 2.61 |

|     |             |                         |     |    |     |       |      |      |      |      |      |
|-----|-------------|-------------------------|-----|----|-----|-------|------|------|------|------|------|
|     | cca-miR477i | UGGAAGCCUUUGAGGGA       |     | 17 | 72  | 62.50 | 1.11 | 0.35 | 0.11 | 0.04 | 4.17 |
|     | cca-miR477j | AUCUCCUCAAAGGUUCCA      |     | 20 | 55  | 67.27 | 0.67 | 0.27 | 0.29 | 0.11 | 3.64 |
| 478 | cca-miR478a | UAACGUGUACUUCUAUUUUUA   | UUA | 21 | 490 | 70.41 | 0.66 | 0.29 | 0.48 | 0.14 | 3.47 |
|     | cca-miR482a | AAUGGGAGGAACUAGGAAG     |     | 19 | 134 | 61.19 | 0.52 | 0.28 | 0.22 | 0.08 | 2.99 |
|     | cca-miR482b | CCUACUCGUCCCAUCC        |     | 17 | 440 | 61.82 | 0.65 | 0.31 | 0.31 | 0.10 | 2.50 |
|     | cca-miR482c | UUGGAAUGGGACGUUUUGGAAA  |     | 22 | 150 | 54.00 | 1.09 | 0.37 | 0.03 | 0.01 | 3.33 |
|     | cca-miR482d | AGGAAUGGGCAGUUUAGGAAGA  |     | 22 | 477 | 66.46 | 0.69 | 0.33 | 0.33 | 0.10 | 2.73 |
|     | cca-miR482e | UUUCUUACUCCUCCCAUACC    |     | 20 | 149 | 57.05 | 0.56 | 0.32 | 0.17 | 0.06 | 3.36 |
|     | cca-miR482f | UCCCCUUUCCUCCCAU        |     | 18 | 274 | 54.74 | 0.62 | 0.32 | 0.44 | 0.13 | 4.01 |
| 482 | cca-miR482g | GGAAUGGGUGGGAUAGGAAAGA  | UUC | 22 | 375 | 69.60 | 0.66 | 0.32 | 0.38 | 0.11 | 2.93 |
|     | cca-miR530a | UGCAUUUGCAGCUGCACUUU    |     | 20 | 91  | 58.24 | 1.04 | 0.40 | 0.09 | 0.04 | 8.79 |
| 530 | cca-miR530b | GAAAGUGCAGGUGCAAGUGCA   | UGC | 21 | 145 | 51.03 | 0.86 | 0.28 | 0.14 | 0.04 | 6.21 |
| 535 | cca-miR535a | AGUGACAACAAGAGAAAGCA    | UGU | 20 | 422 | 66.82 | 0.63 | 0.33 | 0.34 | 0.11 | 2.84 |
| 771 | cca-miR771a | CAUGAAAUCUGAGGAGCC      | AUG | 19 | 407 | 57.74 | 0.63 | 0.33 | 0.33 | 0.10 | 2.70 |
| 774 | cca-miR774a | AGAUGAAGAUUGGGAUGAC     | AUU | 19 | 208 | 71.15 | 0.64 | 0.31 | 0.31 | 0.10 | 5.29 |
| 781 | cca-miR781a | AAUUAGAGUUUUAAGGAUACU   | UAA | 21 | 255 | 76.86 | 0.79 | 0.30 | 0.18 | 0.06 | 5.88 |
| 816 | cca-miR816a | UUGUAUUAAAAUAUGUCA      | AUG | 18 | 77  | 71.43 | 0.91 | 0.36 | 0.04 | 0.02 | 2.60 |
|     | cca-miR821a | AGUCCUCAACAACAAGUU      |     | 19 | 270 | 63.70 | 0.60 | 0.29 | 0.39 | 0.12 | 3.70 |
|     | cca-miR821b | AAGUCAUCAUAUUAAGUUG     |     | 21 | 210 | 68.10 | 0.67 | 0.32 | 0.31 | 0.10 | 4.76 |
|     | cca-miR821c | CUUUUAUUUUGAUGACUU      |     | 18 | 433 | 67.44 | 0.56 | 0.30 | 0.41 | 0.12 | 4.16 |
|     | cca-miR821d | AAGUCUUCAAAUAAGUU       |     | 19 | 192 | 74.48 | 0.52 | 0.32 | 0.49 | 0.15 | 3.65 |
| 821 | cca-miR821e | AAGUUAUCAAAAACAAGUU     | AAA | 20 | 107 | 75.70 | 0.67 | 0.35 | 0.36 | 0.13 | 4.67 |
| 825 | cca-miR825a | GCUUCUUCUAGUUGGUGCUUGA  | AAG | 22 | 305 | 58.36 | 0.58 | 0.31 | 0.33 | 0.11 | 3.28 |
| 827 | cca-miR827a | GUAUGGAUGUCAACAACAAA    | CAU | 21 | 300 | 72.00 | 0.62 | 0.31 | 0.25 | 0.08 | 3.67 |
|     | cca-miR828a | UUGCUUGCUCAAAUGAGCAUCU  |     | 22 | 435 | 73.56 | 0.62 | 0.29 | 0.39 | 0.12 | 3.22 |
|     | cca-miR828b | UAAUAAUUCUUGCUCUAAUGA   |     | 21 | 440 | 69.32 | 0.65 | 0.33 | 0.22 | 0.07 | 2.73 |
| 828 | cca-miR828c | UGGAAUACUCAUUUGAGCAAGA  | AUG | 22 | 102 | 59.80 | 0.97 | 0.39 | 0.09 | 0.04 | 6.86 |
|     | cca-miR829a | UUUGAACCUUUGAUUUGAA     |     | 19 | 302 | 74.17 | 0.62 | 0.29 | 0.43 | 0.13 | 3.97 |
|     | cca-miR829b | ACUUUGAAUCAUUGAUUUG     |     | 19 | 341 | 71.55 | 0.71 | 0.32 | 0.35 | 0.12 | 2.64 |
| 829 | cca-miR829c | UUCAAAUCAAAUGUCAAAG     | UGA | 20 | 428 | 67.52 | 0.58 | 0.31 | 0.42 | 0.13 | 2.80 |
| 831 | cca-miR831a | AGAAGAGGAAGAAGGAGAUGAGA | AAG | 23 | 353 | 63.17 | 0.59 | 0.30 | 0.33 | 0.10 | 3.97 |

|      |              |                        |     |    |     |       |      |      |      |      |      |
|------|--------------|------------------------|-----|----|-----|-------|------|------|------|------|------|
| 835  | cca-miR835a  | CUUUCUUGCUIIUUCUUCUUCA | UCU | 21 | 402 | 53.98 | 0.68 | 0.32 | 0.30 | 0.10 | 2.99 |
| 837  | cca-miR837a  | ACGAAGAAGAAACUGAUGA    | UUU | 19 | 370 | 72.16 | 0.60 | 0.29 | 0.34 | 0.10 | 2.70 |
|      | cca-miR837b  | AUUGUUUUUUUUUUUUUCA    |     | 20 | 396 | 70.45 | 1.12 | 0.32 | 0.22 | 0.07 | 3.54 |
| 838  | cca-miR838a  | UUUUCUUCUUUUUCUUCACA   | UCU | 21 | 487 | 75.98 | 0.89 | 0.31 | 0.39 | 0.11 | 3.08 |
| 845  | cca-miR845a  | CAUCAUUUGGUAUUAGAGC    | AUU | 19 | 289 | 71.97 | 0.63 | 0.29 | 0.41 | 0.14 | 5.54 |
|      | cca-miR845b  | GUUGAUCUGAUACCAAUUG    |     | 19 | 365 | 76.99 | 0.67 | 0.31 | 0.39 | 0.12 | 6.03 |
|      | cca-miR845c  | AGCUAUGAUACCAAUGAUA    |     | 20 | 316 | 72.15 | 0.59 | 0.31 | 0.35 | 0.11 | 4.75 |
|      | cca-miR845d  | UAUCAAUAGUAUCAAGCU     |     | 20 | 270 | 61.11 | 0.68 | 0.34 | 0.40 | 0.13 | 3.33 |
|      | cca-miR845e  | UAGCCCUGAUACCAAUUGA    |     | 19 | 262 | 67.56 | 0.50 | 0.26 | 0.47 | 0.13 | 2.67 |
|      | cca-miR845f  | AGGCUCUGAUACCACUUGAUG  |     | 21 | 224 | 66.52 | 0.90 | 0.35 | 0.37 | 0.11 | 5.36 |
|      | cca-miR845g  | CAUCAAGUGGUAUCAGAGCCA  |     | 21 | 363 | 65.01 | 0.56 | 0.28 | 0.41 | 0.12 | 3.03 |
| 846  | cca-miR846a  | AUUCAAUCACUCAAUUCA     | UGA | 19 | 220 | 76.82 | 0.56 | 0.25 | 0.40 | 0.12 | 2.73 |
|      | cca-miR846b  | UUGACUUGAAAUGCUUGAAUU  |     | 21 | 407 | 61.92 | 0.64 | 0.33 | 0.34 | 0.10 | 2.95 |
| 854  | cca-miR854a  | AUGAUGAUA AUGAGGAGGAG  | GAG | 20 | 176 | 60.80 | 0.58 | 0.33 | 0.31 | 0.11 | 4.55 |
| 857  | cca-miR857a  | AAACUUACACCAUACAUAUA   | AAA | 21 | 496 | 65.93 | 0.56 | 0.26 | 0.38 | 0.11 | 3.83 |
| 859  | cca-miR859a  | UGAUUUUACAAAAGAUAGA    | GAU | 19 | 273 | 76.92 | 0.76 | 0.33 | 0.49 | 0.16 | 3.30 |
|      | cca-miR859b  | AUUUUACAUUAGAUAGAU     |     | 19 | 493 | 75.86 | 0.66 | 0.30 | 0.42 | 0.13 | 2.64 |
|      | cca-miR859c  | UAUCUAUCUAUUUUAUUUU    |     | 19 | 224 | 76.34 | 0.83 | 0.30 | 0.42 | 0.14 | 2.68 |
| 860  | cca-miR860a  | UCAAUAGUUUGGACCAUAUUAU | AAU | 21 | 272 | 66.91 | 0.58 | 0.33 | 0.38 | 0.12 | 4.04 |
|      | cca-miR860b  | UUCAAUAAAUUGGACUAUA    |     | 19 | 430 | 65.81 | 0.59 | 0.28 | 0.33 | 0.10 | 2.79 |
|      | cca-miR860c  | AUAUACUCCAAUGUAUUGAAG  |     | 21 | 361 | 65.37 | 0.63 | 0.29 | 0.34 | 0.11 | 3.05 |
| 862  | cca-miR862a  | CUUCUAAGACAUCCAGC      | UUC | 17 | 431 | 63.57 | 0.68 | 0.32 | 0.42 | 0.13 | 3.25 |
|      | cca-miR862b  | UCCUUAAGGACAUGCAGC     |     | 19 | 168 | 58.93 | 0.47 | 0.26 | 0.36 | 0.11 | 3.57 |
| 868  | cca-miR868a  | UUCUUAAGUGUUGAUGAUGU   | AUA | 20 | 475 | 76.42 | 0.74 | 0.31 | 0.38 | 0.12 | 4.42 |
|      | cca-miR868b  | CAUUAUCAGUAGUUAAGAAG   |     | 20 | 174 | 64.37 | 0.48 | 0.26 | 0.50 | 0.14 | 4.02 |
| 900  | cca-miR900a  | UGUUCUUGUACCUGGGAA     | AGA | 18 | 152 | 63.16 | 0.68 | 0.30 | 0.29 | 0.10 | 2.63 |
| 902  | cca-miR902a  | GAAGAAUCUGGAUCAU       | GAU | 16 | 232 | 65.95 | 0.74 | 0.33 | 0.33 | 0.11 | 3.88 |
|      | cca-miR902b  | UUAUGAUGUUGAUCCUUCA    |     | 19 | 324 | 66.05 | 0.57 | 0.27 | 0.38 | 0.11 | 2.78 |
|      | cca-miR902c  | UUAUGUUGAAGAUUCUUCAU   |     | 20 | 102 | 58.82 | 0.53 | 0.30 | 0.43 | 0.14 | 5.88 |
| 952  | cca-miR952a  | AACUGAGAAUGAAAUUGGUG   | AUU | 20 | 467 | 72.38 | 0.68 | 0.30 | 0.35 | 0.11 | 4.93 |
| 1023 | cca-miR1023a | GUAGGGAAAUGGAGAGUGUGU  | UUG | 21 | 373 | 44.50 | 0.57 | 0.33 | 0.32 | 0.11 | 3.75 |

|      |              |                         |     |    |     |       |      |      |      |      |      |
|------|--------------|-------------------------|-----|----|-----|-------|------|------|------|------|------|
|      | cca-miR1023b | ACUCUCUCGGUUUCCCUUC     |     | 19 | 356 | 60.96 | 0.64 | 0.33 | 0.41 | 0.12 | 2.81 |
| 1025 | cca-miR1025a | UGCCACAACAAAGCAAUAA     | UGU | 20 | 151 | 64.24 | 0.48 | 0.30 | 0.31 | 0.11 | 5.30 |
| 1027 | cca-miR1027a | UUGGAAGAGAAGAAAGAAA     | AGA | 19 | 425 | 63.76 | 0.71 | 0.32 | 0.21 | 0.07 | 3.76 |
|      | cca-miR1027b | GAUUAGAAAAGAAGAUAGAA    |     | 20 | 499 | 76.95 | 0.74 | 0.31 | 0.43 | 0.11 | 2.81 |
| 1030 | cca-miR1030a | UCUGCAUCUGCAUCUGCACC    | UGC | 20 | 378 | 40.48 | 0.61 | 0.32 | 0.30 | 0.10 | 3.17 |
|      | cca-miR1030b | UGGUGGAGGUGCAGAUGCA     |     | 19 | 75  | 48.00 | 0.70 | 0.31 | 0.17 | 0.06 | 4.00 |
| 1039 | cca-miR1039a | UCUUUGUGUCUGUCUCUCCU    | CUU | 20 | 400 | 52.50 | 0.61 | 0.32 | 0.32 | 0.11 | 2.50 |
| 1044 | cca-miR1044a | AAAACAAAUAUCCACUAC      | UUU | 18 | 489 | 61.76 | 0.69 | 0.33 | 0.41 | 0.13 | 2.66 |
|      | cca-miR1044b | UUGUAGUGCAUAGUUUGUUUU   |     | 21 | 91  | 67.03 | 0.55 | 0.33 | 0.29 | 0.11 | 6.59 |
|      | cca-miR1044c | GUUUUUAGUGCAUUUUUGUGC   |     | 21 | 62  | 69.35 | 0.95 | 0.32 | 0.11 | 0.04 | 4.84 |
| 1046 | cca-miR1046a | GGUGAAAAAAUUGAAAAAU     | UCA | 19 | 497 | 74.04 | 0.62 | 0.28 | 0.46 | 0.13 | 2.62 |
|      | cca-miR1046b | UGGAUUGCAUAUUUUUCACG    |     | 20 | 499 | 65.73 | 0.53 | 0.28 | 0.42 | 0.13 | 2.81 |
| 1051 | cca-miR1051a | UCUUCUGUUUACUUGAA       | GAA | 18 | 242 | 73.55 | 1.06 | 0.31 | 0.26 | 0.08 | 4.13 |
|      | cca-miR1051b | GGUUCAAGUGAGAAGGAAGA    |     | 20 | 146 | 60.27 | 0.74 | 0.32 | 0.38 | 0.13 | 6.85 |
| 1061 | cca-miR1061a | UGAGUAAUCUAUGAAUAA      | AUG | 19 | 358 | 64.25 | 0.61 | 0.32 | 0.39 | 0.12 | 3.35 |
| 1078 | cca-miR1078a | UUUGGAUAAUAAAUUGUGAU    | AUU | 21 | 263 | 70.72 | 0.61 | 0.30 | 0.36 | 0.12 | 5.32 |
|      | cca-miR1078b | UUGGAUGAUUGAAAUGUGAU    |     | 20 | 155 | 74.19 | 0.86 | 0.35 | 0.11 | 0.04 | 7.10 |
|      | cca-miR1078c | AUCACAUUUUAAUCAUCCAA    |     | 20 | 451 | 73.84 | 0.74 | 0.27 | 0.26 | 0.07 | 4.88 |
|      | cca-miR1078d | AUCACAAUAAAUAAAUCAA     |     | 20 | 480 | 74.17 | 0.59 | 0.32 | 0.39 | 0.12 | 4.58 |
|      | cca-miR1078e | UUGAUUGAAUCAGUUGUGAU    |     | 20 | 256 | 73.05 | 0.85 | 0.34 | 0.31 | 0.10 | 5.08 |
| 1087 | cca-miR1087a | ACAGAUUGGUUUUAGUGCU     | UUU | 19 | 366 | 67.76 | 0.63 | 0.31 | 0.43 | 0.13 | 4.64 |
| 1088 | cca-miR1088a | AGAAGAAAGAGUGCAGGCAU    | UCU | 20 | 271 | 66.42 | 0.50 | 0.29 | 0.41 | 0.12 | 2.58 |
| 1097 | cca-miR1097a | GCCAAUGUUGUUGUUGGAA     | UUG | 19 | 349 | 57.88 | 0.54 | 0.29 | 0.38 | 0.11 | 4.58 |
| 1128 | cca-miR1128a | UUUGGGACGGAGGGGGUAG     | UAU | 19 | 316 | 64.24 | 0.71 | 0.31 | 0.33 | 0.10 | 4.11 |
| 1130 | cca-miR1130a | UCUUAUAUUAAGUGACAGA     | UAA | 19 | 334 | 71.56 | 0.73 | 0.32 | 0.45 | 0.12 | 2.99 |
| 1134 | cca-miR1134a | CGACAACCACAGCAAGAAGAAGA | CAA | 23 | 491 | 57.43 | 0.56 | 0.31 | 0.45 | 0.14 | 4.28 |
|      | cca-miR1134b | UCUUCUUGUUGUUGUUGUUG    |     | 23 | 242 | 57.02 | 0.66 | 0.33 | 0.18 | 0.06 | 3.31 |
| 1153 | cca-miR1153a | UUGUAGUUGCAGCAUCACU     | AUU | 20 | 473 | 60.04 | 0.55 | 0.31 | 0.27 | 0.09 | 3.81 |
| 1171 | cca-miR1171a | UGGAGUGGAGUGGAGUGGAGUGG | GUG | 23 | 319 | 58.93 | 0.56 | 0.33 | 0.41 | 0.13 | 2.82 |
| 1217 | cca-miR1217a | AAUUUGAAGGAUGUUGUCAAG   | UUG | 21 | 143 | 62.24 | 0.79 | 0.34 | 0.29 | 0.10 | 2.80 |
| 1320 | cca-miR1320a | UUGGAACGAAUUUAUUUAC     | AUU | 20 | 417 | 76.50 | 0.65 | 0.30 | 0.51 | 0.15 | 6.71 |

|      |              |                          |     |    |     |       |      |      |      |      |      |
|------|--------------|--------------------------|-----|----|-----|-------|------|------|------|------|------|
|      | cca-miR1320b | UAAAAUUCAUUCUUCCAA       |     | 19 | 379 | 75.99 | 0.67 | 0.29 | 0.39 | 0.11 | 7.39 |
| 1426 | cca-miR1426a | UUUAAUCAUAAACAAGAUUC     | AAA | 20 | 505 | 76.44 | 0.59 | 0.27 | 0.45 | 0.12 | 4.36 |
| 1428 | cca-miR1428a | UAAGAUAAUGCUAUGAUUUCG    | AUU | 21 | 91  | 67.03 | 0.45 | 0.32 | 0.45 | 0.15 | 3.30 |
| 1430 | cca-miR1430a | UGGUGAGCCUUCUUGCUA       | UGG | 19 | 150 | 51.33 | 0.58 | 0.33 | 0.32 | 0.10 | 2.67 |
| 1435 | cca-miR1435a | UUUCUUAUUCAAACCUU        | AAA | 18 | 120 | 75.83 | 0.47 | 0.29 | 0.35 | 0.11 | 5.00 |
|      | cca-miR1435b | AAAAAGUUUAACUUAUGAAA     |     | 20 | 298 | 68.79 | 0.55 | 0.27 | 0.30 | 0.09 | 3.02 |
|      | cca-miR1435c | UUCUUCAGUCAACUUUU        |     | 18 | 59  | 62.71 | 0.63 | 0.29 | 0.14 | 0.06 | 3.39 |
|      | cca-miR1435d | AAAAAAUUUGACUUAAGAAA     |     | 20 | 417 | 68.82 | 0.50 | 0.27 | 0.41 | 0.12 | 3.60 |
|      | cca-miR1435e | UUUCUUAAGUUAUUUUUUU      |     | 20 | 496 | 76.01 | 0.69 | 0.32 | 0.45 | 0.14 | 3.63 |
| 1438 | cca-miR1438f | AGGGUAAUUUGAUAAUUUUUA    | AAU | 21 | 334 | 75.45 | 0.90 | 0.30 | 0.34 | 0.09 | 5.09 |
|      | cca-miR1438g | GGUACUUUAUCAUUUUUA       |     | 20 | 168 | 76.79 | 0.92 | 0.35 | 0.25 | 0.09 | 4.76 |
|      | cca-miR1438h | UUAAAAUAAUAAUAAUACCCU    |     | 22 | 393 | 76.59 | 0.62 | 0.32 | 0.40 | 0.13 | 5.85 |
| 1439 | cca-miR1439a | UUUUGGAACGGAAUGAGUA      | AAU | 19 | 111 | 76.58 | 0.65 | 0.31 | 0.12 | 0.04 | 7.21 |
| 1446 | cca-miR1446a | UUGAGAGAGAGAAUUCAGAA     | UCU | 20 | 505 | 63.17 | 1.01 | 0.34 | 0.20 | 0.06 | 4.55 |
| 1507 | cca-miR1507a | UCAUCCAAACGUCAUCU        | CAU | 18 | 242 | 65.70 | 0.55 | 0.29 | 0.30 | 0.10 | 4.13 |
| 1508 | cca-miR1508a | UAGAAAGUGAAAUAGCAGUUG    | UUG | 21 | 392 | 56.63 | 0.53 | 0.29 | 0.30 | 0.10 | 3.06 |
|      | cca-miR1508b | UAGAGAGGGAAAUGGCAGUUG    |     | 21 | 88  | 63.64 | 0.89 | 0.38 | 0.12 | 0.05 | 6.82 |
| 1510 | cca-miR1510a | UGUUGUUUUACCUAUUCCACC    | UGU | 21 | 92  | 61.96 | 1.19 | 0.34 | 0.13 | 0.04 | 5.43 |
| 1511 | cca-miR1511a | CAUGGUAUCAGAGCUUGGUU     | CAU | 20 | 344 | 63.66 | 0.59 | 0.28 | 0.39 | 0.11 | 2.91 |
|      | cca-miR1511b | AACCAAGCUCUGAUACCAUG     |     | 20 | 241 | 67.63 | 0.43 | 0.27 | 0.44 | 0.14 | 3.32 |
| 1512 | cca-miR1512a | AUACAUAAGAAUUUUUAGUU     | AAU | 21 | 356 | 76.97 | 1.38 | 0.37 | 0.13 | 0.05 | 5.62 |
|      | cca-miR1512b | UACUGAACAUUCUAAAAGCAU    |     | 22 | 488 | 69.06 | 0.58 | 0.29 | 0.43 | 0.13 | 3.28 |
| 1514 | cca-miR1514a | CAAUGCCUAUUUUAAAAAUGAA   | UUU | 22 | 66  | 66.67 | 1.04 | 0.29 | 0.16 | 0.05 | 3.03 |
|      | cca-miR1514b | UUCAUUUUAAAAUAGGCAUUG    |     | 21 | 79  | 67.09 | 1.08 | 0.33 | 0.16 | 0.06 | 3.80 |
| 1516 | cca-miR1516a | CAAGUUAGAAGCACUUUUGAGAG  | CUU | 23 | 94  | 68.09 | 0.94 | 0.38 | 0.09 | 0.04 | 4.26 |
|      | cca-miR1516b | UAUUUCAGUAGAGAAGCU       |     | 19 | 97  | 70.10 | 0.86 | 0.37 | 0.16 | 0.06 | 3.09 |
|      | cca-miR1516c | AGCUUCUCUACUGAAAAUAUA    |     | 21 | 111 | 69.37 | 1.26 | 0.39 | 0.03 | 0.02 | 2.70 |
|      | cca-miR1516d | UUGGAUACAAGCUAGAAGUAC    |     | 21 | 129 | 67.44 | 1.06 | 0.36 | 0.21 | 0.08 | 3.10 |
| 1518 | cca-miR1518a | UGUGUAGUAAAUUGAAUAUCA    | ACA | 21 | 275 | 74.18 | 0.69 | 0.30 | 0.34 | 0.11 | 2.91 |
| 1520 | cca-miR1520a | CAAUGAGAACAUGUCACAUGACAA | UGA | 24 | 380 | 61.84 | 0.81 | 0.34 | 0.26 | 0.09 | 2.63 |
| 1521 | cca-miR1521a | UCAACAUUUUUCAUUAAC       | AUU | 18 | 406 | 61.08 | 0.41 | 0.25 | 0.42 | 0.12 | 3.20 |



|      |              |                        |     |    |     |       |      |      |      |      |      |
|------|--------------|------------------------|-----|----|-----|-------|------|------|------|------|------|
|      | cca-miR1521b | UGUUAUUGGAAAAUGUUG     |     | 18 | 113 | 76.11 | 0.80 | 0.32 | 0.21 | 0.07 | 3.54 |
|      | cca-miR1521c | AACAUUUCCAGUACAG       |     | 18 | 424 | 71.23 | 0.80 | 0.32 | 0.41 | 0.12 | 4.01 |
| 1522 | cca-miR1522a | AUUUCAUCUUAUGCAAUAA    | UAA | 19 | 385 | 76.88 | 0.65 | 0.29 | 0.41 | 0.12 | 4.42 |
|      | cca-miR1522b | AUUUCAUUUUAAGUAAUAA    |     | 19 | 177 | 75.14 | 0.80 | 0.31 | 0.32 | 0.11 | 3.95 |
|      | cca-miR1522c | AUUUUAUUUUAACAAUAA     |     | 19 | 156 | 76.92 | 0.60 | 0.28 | 0.46 | 0.14 | 7.69 |
|      | cca-miR1522d | UUUAUUUCUAAAAUAAAAU    |     | 20 | 497 | 64.59 | 0.76 | 0.27 | 0.25 | 0.07 | 3.22 |
|      | cca-miR1522e | UUUAUUGCUGAAAUGAAA     |     | 19 | 477 | 75.68 | 0.66 | 0.31 | 0.33 | 0.10 | 2.94 |
| 1525 | cca-miR1525a | UGGGUUAUUUAAGUUUUAGU   | UAA | 21 | 443 | 73.14 | 0.57 | 0.28 | 0.48 | 0.13 | 4.97 |
|      | cca-miR1525b | ACUAAAAACUUAUUUAACC    |     | 19 | 144 | 75.00 | 0.66 | 0.33 | 0.38 | 0.13 | 6.94 |
| 1527 | cca-miR1527a | GGUUUUGUAGGGUUGAGUUA   | AAC | 20 | 145 | 73.10 | 0.46 | 0.29 | 0.40 | 0.12 | 2.76 |
|      | cca-miR1527b | UAACUCAACCCUACAAAACC   |     | 20 | 76  | 60.53 | 0.94 | 0.32 | 0.15 | 0.06 | 3.95 |
| 1530 | cca-miR1530a | UUUUCACAUUAUUAUAUAU    | UAU | 21 | 475 | 72.84 | 0.74 | 0.33 | 0.35 | 0.11 | 5.47 |
|      | cca-miR1530b | UAUUUUCAUUUUAUGUAAAA   |     | 20 | 232 | 74.14 | 0.53 | 0.29 | 0.41 | 0.12 | 3.02 |
|      | cca-miR1530c | AUAUUAAAUUUCUGUGAAA    |     | 21 | 410 | 73.66 | 0.74 | 0.29 | 0.32 | 0.10 | 4.15 |
|      | cca-miR1530d | AUAUUGUACUUUAUGUGAAA   |     | 20 | 186 | 65.05 | 0.65 | 0.33 | 0.36 | 0.12 | 4.30 |
|      | cca-miR1530e | UUUUAACAUAUUUAUUUAU    |     | 21 | 504 | 76.98 | 0.69 | 0.30 | 0.36 | 0.10 | 5.16 |
|      | cca-miR1530f | AUAUUUUUAUUUAUAUGAAA   |     | 21 | 111 | 75.68 | 0.56 | 0.32 | 0.40 | 0.12 | 6.31 |
| 1533 | cca-miR1533a | UCAUUAUUUUUAUUUAU      | UAU | 19 | 498 | 70.08 | 0.64 | 0.29 | 0.23 | 0.07 | 4.22 |
|      | cca-miR1533b | AUAAUAAAAUAAUCAUGA     |     | 19 | 205 | 74.15 | 0.82 | 0.33 | 0.15 | 0.05 | 4.88 |
| 1534 | cca-miR1534a | UAUUUUGAGUAAAUGGUCA    | AUU | 19 | 503 | 70.58 | 0.70 | 0.29 | 0.43 | 0.13 | 4.17 |
|      | cca-miR1534b | UAUUUUCGGUGAAUAGUCAU   |     | 20 | 418 | 76.56 | 0.78 | 0.32 | 0.35 | 0.10 | 6.94 |
| 1535 | cca-miR1535a | UUGUUUGUGGUUAUGUC      | CUU | 17 | 108 | 61.11 | 0.73 | 0.31 | 0.11 | 0.03 | 3.70 |
| 1852 | cca-miR1852a | UAUGGAUUCUGAUUGCAGGU   | AUU | 20 | 142 | 61.27 | 0.67 | 0.31 | 0.21 | 0.08 | 2.82 |
| 1854 | cca-miR1854a | UGGUGAAAUUUGGAGCUUGGA  | AUU | 21 | 430 | 60.70 | 0.60 | 0.30 | 0.48 | 0.14 | 3.49 |
| 1863 | cca-miR1863a | AAAUCUAACAUAGUAUCAGAGC | UGA | 22 | 423 | 65.72 | 0.72 | 0.31 | 0.39 | 0.13 | 2.60 |
|      | cca-miR1863b | AGCUCUGAUACCAUCUAAAUUU |     | 23 | 126 | 65.87 | 0.80 | 0.32 | 0.25 | 0.08 | 3.17 |
|      | cca-miR1863c | GCUCUGAUUCCAUGUUAGAUAU |     | 21 | 486 | 68.52 | 0.64 | 0.31 | 0.28 | 0.09 | 3.09 |
| 1916 | cca-miR1916a | UUCACUUUGACACCUCAA     | UGA | 18 | 498 | 72.49 | 0.92 | 0.35 | 0.21 | 0.07 | 3.61 |
| 1917 | cca-miR1917a | ACUUUAGUAUUCUUUAUUAAU  | UAA | 21 | 253 | 75.49 | 0.64 | 0.30 | 0.44 | 0.13 | 4.35 |
| 2055 | cca-miR2055a | UCCUUGGGAAGUUGGUUUC    | AAG | 19 | 258 | 62.40 | 0.45 | 0.29 | 0.41 | 0.13 | 2.71 |
| 2079 | cca-miR2079a | AGAGUUGAUGUUGAUGAC     | UAA | 18 | 238 | 66.81 | 0.65 | 0.30 | 0.43 | 0.13 | 3.78 |

|      |              |                         |     |    |     |       |      |      |      |      |      |
|------|--------------|-------------------------|-----|----|-----|-------|------|------|------|------|------|
| 2086 | cca-miR2086a | GACAUGAAUGCAGAACUG      | UUU | 18 | 116 | 67.24 | 0.77 | 0.31 | 0.24 | 0.08 | 5.17 |
| 2089 | cca-miR2089a | AUGGUAUUGGUGGAAUUGGUA   | AUU | 22 | 369 | 61.79 | 0.67 | 0.33 | 0.28 | 0.10 | 2.71 |
|      | cca-miR2089b | AUGGAAUCGGGGGAAUAGGUAA  |     | 22 | 466 | 67.38 | 0.67 | 0.32 | 0.46 | 0.15 | 4.29 |
| 2090 | cca-miR2090a | AAAAAUUCUAAAAUCAGAGU    | AUU | 20 | 505 | 73.47 | 0.85 | 0.34 | 0.31 | 0.10 | 5.94 |
|      | cca-miR2093a | UGCAUGAAUUGGAAGAUG      | AUU | 18 | 496 | 73.19 | 0.66 | 0.27 | 0.37 | 0.11 | 4.84 |
| 2093 | cca-miR2093b | UGUUCUUUCUAUUAAUGCA     |     | 19 | 480 | 60.42 | 0.71 | 0.33 | 0.41 | 0.13 | 2.71 |
| 2101 | cca-miR2101a | ACAUUUUUACAAGAUAAAUGU   | CAA | 22 | 270 | 70.00 | 0.50 | 0.29 | 0.32 | 0.10 | 3.70 |
| 2102 | cca-miR2102a | GUGGCGGCGGAUGCUUGCCC    | CCG | 20 | 110 | 39.09 | 0.75 | 0.37 | 0.11 | 0.04 | 2.73 |
| 2105 | cca-miR2105a | UGUGAAGUGAAUGAUUCAU     | AUU | 19 | 416 | 62.74 | 0.60 | 0.30 | 0.29 | 0.09 | 3.61 |
| 2108 | cca-miR2108a | UUA AUGUGUAUGUGUUUGUGAG | UGU | 22 | 240 | 60.00 | 0.76 | 0.32 | 0.25 | 0.08 | 5.00 |
| 2111 | cca-miR2111a | CAAACCUUAGGAUGAAGAUU    | UUA | 20 | 112 | 66.96 | 0.69 | 0.33 | 0.07 | 0.03 | 3.57 |
|      | cca-miR2111b | GUCCUUGGGAUGCAGAUUACC   |     | 21 | 227 | 62.11 | 1.05 | 0.35 | 0.21 | 0.07 | 2.64 |
|      | cca-miR2111c | UAAUCUGCAUCCUGAGGUUA    |     | 21 | 87  | 56.32 | 1.19 | 0.39 | 0.08 | 0.04 | 3.45 |
| 2118 | cca-miR2118a | UAGGAAUGGGUGGAAUCGG     | UCC | 19 | 160 | 56.88 | 0.57 | 0.26 | 0.33 | 0.11 | 2.50 |
| 2119 | cca-miR2119a | CAAAGGGAGUUGUAGGGGAA    | UUU | 20 | 259 | 67.18 | 0.82 | 0.35 | 0.16 | 0.05 | 4.63 |
| 2199 | cca-miR2199b | UGAUACACUAGUAUGGAUCAC   | AUA | 21 | 505 | 72.67 | 0.69 | 0.31 | 0.38 | 0.12 | 3.37 |
| 2275 | cca-miR2275a | AGGAUUAGCGGGACUUGAA     | UUG | 19 | 213 | 60.09 | 0.57 | 0.33 | 0.23 | 0.08 | 2.82 |
| 2592 | cca-miR2592a | AACAACAAGACUCAAACAUUU   | AUU | 21 | 350 | 60.86 | 0.66 | 0.33 | 0.31 | 0.10 | 2.57 |
|      | cca-miR2592b | AGUAAUGCAAACUUGUUA      |     | 19 | 417 | 65.23 | 0.58 | 0.27 | 0.42 | 0.12 | 2.88 |
|      | cca-miR2592c | UUUAACAAUUUUGAAUACU     |     | 20 | 344 | 72.09 | 0.62 | 0.31 | 0.47 | 0.14 | 4.36 |
|      | cca-miR2592d | AAUGC UUAAGGCAUGUUGUU   |     | 20 | 360 | 63.89 | 0.64 | 0.34 | 0.37 | 0.12 | 2.50 |
| 2595 | cca-miR2595a | AGACAAAAGAAGAAAUG       | UUA | 19 | 294 | 73.47 | 0.78 | 0.33 | 0.31 | 0.10 | 3.74 |
|      | cca-miR2595b | ACAUAAAGAAAAAAUGUA      |     | 19 | 291 | 75.95 | 0.79 | 0.33 | 0.24 | 0.08 | 3.44 |
| 2600 | cca-miR2600a | GCAUUGUGAGUGGCUAAUGU    | UUG | 20 | 188 | 68.09 | 0.74 | 0.35 | 0.26 | 0.08 | 5.32 |
| 2604 | cca-miR2604a | UAAUUUUUGUGUGGAAGUGUU   | UUA | 21 | 116 | 69.83 | 0.73 | 0.34 | 0.12 | 0.05 | 3.45 |
| 2606 | cca-miR2606a | AAAAGCACUUAAGGAAUUG     | AAU | 19 | 437 | 66.13 | 0.84 | 0.35 | 0.40 | 0.13 | 4.58 |
|      | cca-miR2606b | AAAUCACCUAGGGAAUUGUA    |     | 21 | 406 | 67.73 | 0.89 | 0.33 | 0.12 | 0.04 | 3.69 |
| 2607 | cca-miR2607a | AUGUGAUUAUGAGACAAGUG    | AUG | 20 | 352 | 62.50 | 0.74 | 0.34 | 0.34 | 0.11 | 5.40 |
|      | cca-miR2607b | AUGUUAUUAUGUUAUAAGUG    |     | 20 | 435 | 70.80 | 0.69 | 0.31 | 0.42 | 0.13 | 2.99 |
| 2608 | cca-miR2608a | UGGUUCAUAUAUCAUUACUCU   | UCU | 21 | 184 | 67.39 | 0.54 | 0.27 | 0.27 | 0.09 | 2.72 |
| 2611 | cca-miR2611a | UAUUUGUCAGUAUUUGUUGAA   | UUG | 21 | 458 | 65.07 | 0.83 | 0.34 | 0.29 | 0.09 | 3.93 |

|      |              |                        |     |    |     |       |      |      |      |      |      |
|------|--------------|------------------------|-----|----|-----|-------|------|------|------|------|------|
| 2628 | cca-miR2628a | AUGAAAGAAAGAUGAGUA     | AUU | 18 | 488 | 62.09 | 0.46 | 0.25 | 0.44 | 0.12 | 2.66 |
|      | cca-miR2628b | UUACUCAUUAUUCUUUCA     |     | 18 | 348 | 68.97 | 0.61 | 0.28 | 0.43 | 0.13 | 4.31 |
| 2630 | cca-miR2630a | AAAUAACAAGGACCAAAACCA  | AAU | 21 | 488 | 71.72 | 0.69 | 0.31 | 0.41 | 0.13 | 3.07 |
|      | cca-miR2630b | UGGUUUUGAUCCUUGAUUUU   |     | 21 | 490 | 66.12 | 0.67 | 0.34 | 0.40 | 0.13 | 3.27 |
| 2641 | cca-miR2641a | AUAAAAGUAAAGGAUCAA     | AAA | 19 | 487 | 76.80 | 0.98 | 0.35 | 0.30 | 0.10 | 5.54 |
|      | cca-miR2641b | UUUGAUCCUUACAUUUAU     |     | 19 | 234 | 65.81 | 0.51 | 0.32 | 0.45 | 0.14 | 2.56 |
| 2642 | cca-miR2642a | AUGAAUUUCAUCAAACAUG    | UUU | 20 | 190 | 76.84 | 0.70 | 0.33 | 0.35 | 0.11 | 3.16 |
| 2646 | cca-miR2646a | CAUGACAUAUUAGUGAUGAUGU | AUU | 22 | 221 | 76.47 | 0.58 | 0.29 | 0.50 | 0.14 | 7.69 |
| 2650 | cca-miR2650a | AACUAAAUAUGAUUUUAGUCC  | UUU | 22 | 158 | 76.58 | 0.96 | 0.35 | 0.48 | 0.14 | 8.23 |
|      | cca-miR2650b | GGACUAAAAUAUUAUUUAAGUU |     | 22 | 200 | 76.50 | 0.51 | 0.25 | 0.33 | 0.10 | 5.00 |
| 2655 | cca-miR2655a | UAAAGUUAAGGGACCAAAAC   | UAA | 20 | 337 | 76.85 | 0.86 | 0.34 | 0.40 | 0.12 | 4.75 |
|      | cca-miR2655b | UUUUGGUCCCUAAAUUUA     |     | 19 | 313 | 77.00 | 1.09 | 0.33 | 0.23 | 0.08 | 6.39 |
| 2657 | cca-miR2657a | UGUUAUUUCAUCUUUUUGUU   | AUU | 21 | 490 | 71.84 | 0.51 | 0.27 | 0.44 | 0.13 | 4.29 |
| 2665 | cca-miR2665a | UGAUUUCGGUCAAGAAU      | GAA | 19 | 75  | 54.67 | 0.53 | 0.28 | 0.24 | 0.08 | 4.00 |
|      | cca-miR2665b | AUUUCAGGGCAAGAAUGA     |     | 19 | 111 | 59.46 | 0.45 | 0.29 | 0.34 | 0.11 | 2.70 |
| 2671 | cca-miR2671a | UAAAAGUUUAGUUUUGGUC    | UAA | 20 | 271 | 75.28 | 0.71 | 0.31 | 0.30 | 0.11 | 5.17 |
| 2673 | cca-miR2673a | GUGGAAGAGGAAGAGGAAGAGG | UUG | 22 | 107 | 57.94 | 0.65 | 0.38 | 0.49 | 0.16 | 2.80 |
|      | cca-miR2673b | UCUUCUCUCCUCUACCAC     |     | 20 | 400 | 56.25 | 0.57 | 0.29 | 0.33 | 0.10 | 3.75 |
| 2676 | cca-miR2676a | AAAUUAUUAUCCCAACAAU    | AAU | 19 | 333 | 71.17 | 0.46 | 0.29 | 0.44 | 0.14 | 3.60 |
|      | cca-miR2676b | CAUUGUUUGGAUUAUAAU     |     | 19 | 142 | 76.06 | 0.67 | 0.35 | 0.25 | 0.09 | 4.93 |
|      | cca-miR2676c | AUUGUUUUGAAAUAUUUG     |     | 20 | 76  | 73.68 | 0.82 | 0.36 | 0.08 | 0.03 | 3.95 |
| 2866 | cca-miR2866a | GAUGC UUAACAAAACUAGA   | AAC | 20 | 96  | 76.04 | 0.95 | 0.38 | 0.16 | 0.07 | 3.13 |
| 2868 | cca-miR2868a | UUUCUUCUACACAAAACCA    | UUG | 19 | 463 | 71.06 | 0.82 | 0.37 | 0.34 | 0.10 | 3.46 |
|      | cca-miR2868b | UUGGUUUUGUGUAAUAGAA    |     | 19 | 83  | 75.90 | 0.48 | 0.34 | 0.40 | 0.12 | 3.61 |
| 2871 | cca-miR2871a | UAUUUAGUCUUUAUGGUCA    | UAG | 20 | 313 | 77.00 | 0.83 | 0.30 | 0.30 | 0.09 | 2.56 |
| 2873 | cca-miR2873a | UUGGACAUGAGAUUUGGUA    | UUU | 19 | 348 | 65.23 | 0.47 | 0.27 | 0.35 | 0.11 | 2.59 |
|      | cca-miR2873b | CAAUGAAGUUGAGUUUG      |     | 18 | 499 | 59.12 | 0.63 | 0.30 | 0.42 | 0.13 | 3.01 |
|      | cca-miR2873c | CCAAACUCAGCUUCAUUUG    |     | 19 | 467 | 62.10 | 0.64 | 0.30 | 0.36 | 0.12 | 2.57 |
| 2878 | cca-miR2878a | AGGAUUUUAUAUGUAAAGAAU  | AUA | 21 | 369 | 70.46 | 0.66 | 0.32 | 0.51 | 0.14 | 4.34 |
| 2905 | cca-miR2905a | ACAUGUCA AUGACAAAGGC   | UGU | 19 | 397 | 71.28 | 0.54 | 0.30 | 0.33 | 0.10 | 3.02 |
| 2912 | cca-miR2912a | UCUAGAACUCCAGAU AUGG   | UCU | 19 | 335 | 55.52 | 0.73 | 0.37 | 0.30 | 0.10 | 2.69 |

|      |              |                        |     |    |     |       |      |      |      |      |      |
|------|--------------|------------------------|-----|----|-----|-------|------|------|------|------|------|
| 2920 | cca-miR2920a | AAACAACGAUAAUAAUUUCAA  | CAA | 23 | 459 | 71.90 | 0.63 | 0.34 | 0.48 | 0.15 | 2.61 |
| 2923 | cca-miR2923a | UUUGGUUUUAAAUUUUUGUCU  | AUA | 22 | 234 | 73.93 | 0.72 | 0.29 | 0.28 | 0.09 | 3.85 |
| 2928 | cca-miR2928a | AAGAAGAGGACAUUUUGU     | UUU | 18 | 277 | 61.01 | 0.61 | 0.31 | 0.42 | 0.13 | 2.53 |
| 2931 | cca-miR2931a | CUUUAUUGUGGAUGUCA      | UAU | 18 | 432 | 70.60 | 0.65 | 0.29 | 0.36 | 0.10 | 2.78 |
|      | cca-miR2931b | UUAUUGUUGAUGUAAAA      |     | 18 | 303 | 72.28 | 0.82 | 0.35 | 0.40 | 0.12 | 3.63 |
|      | cca-miR2931c | UUUUGACGUCAAAAUAUAAA   |     | 19 | 497 | 73.24 | 0.60 | 0.27 | 0.52 | 0.15 | 3.62 |
| 3433 | cca-miR3433a | GUCAUGUGAGUACUGUGAUG   | AUG | 20 | 504 | 58.33 | 0.60 | 0.32 | 0.43 | 0.13 | 3.37 |
| 3434 | cca-miR3434a | GGUUGAUUCUCUGAUUUUG    | UAA | 19 | 502 | 75.10 | 0.75 | 0.30 | 0.30 | 0.09 | 4.18 |
|      | cca-miR3434b | UCAAAAUAAGAGAAUAAACC   |     | 20 | 505 | 76.44 | 0.73 | 0.29 | 0.46 | 0.14 | 5.35 |
| 3436 | cca-miR3436a | AUCAACAAUGAUUCUUGCUC   | UUU | 20 | 100 | 70.00 | 0.41 | 0.25 | 0.27 | 0.08 | 3.00 |
| 3438 | cca-miR3438a | UCAAGGAUUUGGCUAUGAAG   | UUU | 20 | 338 | 70.71 | 0.69 | 0.26 | 0.42 | 0.11 | 3.25 |
| 3441 | cca-miR3441a | GAAGAAGAUGAAGUCGUUUU   | GAA | 20 | 489 | 67.69 | 0.64 | 0.31 | 0.35 | 0.11 | 2.86 |
| 3444 | cca-miR3444a | AUCUCAUCAUGUCCUAAUA    | AUC | 20 | 140 | 72.14 | 0.56 | 0.27 | 0.37 | 0.11 | 4.29 |
| 3447 | cca-miR3447a | UUUGAGUGUGUUUGAUAUG    | UGA | 19 | 69  | 65.22 | 0.67 | 0.36 | 0.16 | 0.07 | 4.35 |
| 3512 | cca-miR3512a | UCUAUUUGUCAUCACUUGC    | UUA | 19 | 365 | 69.32 | 0.80 | 0.34 | 0.28 | 0.09 | 3.29 |
| 3513 | cca-miR3513a | UACAAAUUCUAUAUUAUCA    | UUG | 20 | 436 | 75.92 | 0.88 | 0.32 | 0.41 | 0.13 | 3.21 |
|      | cca-miR3513b | UACAAUUUUUAUCUUCUCA    |     | 20 | 119 | 70.59 | 0.79 | 0.31 | 0.11 | 0.04 | 3.36 |
|      | cca-miR3513c | UUGAUAAUAUAGAUUUUGUAU  |     | 21 | 477 | 73.58 | 0.79 | 0.33 | 0.32 | 0.10 | 3.35 |
|      | cca-miR3513d | UUAAAUUCUGAGUUCGUCAU   |     | 20 | 503 | 64.41 | 0.61 | 0.31 | 0.33 | 0.10 | 2.58 |
| 3515 | cca-miR3515a | AAUGUAAAAAUGAUCGGUAU   | AAA | 21 | 383 | 70.24 | 0.65 | 0.32 | 0.48 | 0.15 | 2.87 |
| 3522 | cca-miR3522a | UGAGACCAAUCAGCAGCUG    | GCU | 20 | 374 | 58.29 | 0.68 | 0.30 | 0.43 | 0.14 | 4.81 |
| 3626 | cca-miR3626a | GUGGUUGC UUUGAAAUGAAG  | AGU | 21 | 321 | 69.47 | 0.67 | 0.32 | 0.23 | 0.07 | 3.43 |
| 3627 | cca-miR3627a | UUGUCGCAGGAUAGAGGGCACU | UGU | 22 | 135 | 60.74 | 1.23 | 0.39 | 0.16 | 0.06 | 5.19 |
| 3629 | cca-miR3629a | UUGGUUGCUGAGAAAUGC     | UUU | 19 | 372 | 62.37 | 0.68 | 0.31 | 0.35 | 0.11 | 4.03 |
| 3630 | cca-miR3630a | UUUGGGAAUCUCUCUGAUGCA  | UGA | 21 | 474 | 70.04 | 0.60 | 0.28 | 0.43 | 0.12 | 2.53 |
| 3631 | cca-miR3631a | UAUAUUGUAUCAUGUCAACAA  | UAA | 21 | 135 | 71.85 | 0.83 | 0.37 | 0.17 | 0.06 | 5.19 |
| 3704 | cca-miR3704a | GGUCUAGGAGGACUUGGAAAA  | AGA | 22 | 414 | 62.32 | 0.65 | 0.28 | 0.41 | 0.13 | 2.66 |
| 3711 | cca-miR3711a | UGGCGCUAGAAGGAGGGCCU   | ACC | 20 | 57  | 50.88 | 0.56 | 0.32 | 0.14 | 0.06 | 3.51 |
|      | cca-miR3711b | AGGCUCUCUUUCUAGCGCCA   |     | 20 | 156 | 57.05 | 0.45 | 0.30 | 0.41 | 0.13 | 2.56 |
| 3712 | cca-miR3712a | GGGAGUCUGAACUUGAUCAC   | AUC | 20 | 431 | 73.78 | 0.66 | 0.30 | 0.55 | 0.16 | 2.55 |
| 3950 | cca-miR3950a | UUUUUAGGCAACAUAUUUC    | UUU | 20 | 138 | 76.81 | 0.42 | 0.29 | 0.32 | 0.10 | 5.80 |

|      |              |                        |     |    |     |       |      |      |      |      |      |
|------|--------------|------------------------|-----|----|-----|-------|------|------|------|------|------|
| 3951 | cca-miR3951b | UUUCUCUCAUAAUUUAUCUA   | UCU | 19 | 101 | 55.45 | 0.68 | 0.34 | 0.27 | 0.09 | 3.96 |
|      | cca-miR3951c | AGAUAAAGAUGAGAAAAAAA   |     | 20 | 504 | 64.88 | 0.86 | 0.32 | 0.37 | 0.11 | 3.17 |
| 3979 | cca-miR3979a | UUCAAGGGAGAGAGAGA      | AAG | 17 | 437 | 62.01 | 0.56 | 0.31 | 0.59 | 0.17 | 3.43 |
| 4223 | cca-miR4223a | UGUUUAAUAAUCAAAAUCCAU  | AAA | 21 | 465 | 74.41 | 0.76 | 0.34 | 0.28 | 0.09 | 3.23 |
|      | cca-miR4233a | AGUUGAAGUUGAUGAUGUG    |     | 19 | 344 | 71.51 | 0.70 | 0.32 | 0.45 | 0.14 | 4.07 |
| 4233 | cca-miR4233b | GGAGUUGUUGUUGAUGGUGUG  | UGU | 21 | 313 | 56.87 | 0.61 | 0.33 | 0.34 | 0.11 | 4.47 |
| 4237 | cca-miR4237a | GAUUAUAUAUGUUAACGUUU   | AUA | 20 | 284 | 76.76 | 0.65 | 0.32 | 0.42 | 0.14 | 4.58 |
| 4238 | cca-miR4238a | UUGGGAAUUCAAUUUGCAAAAA | UUU | 22 | 312 | 75.00 | 0.70 | 0.30 | 0.50 | 0.15 | 6.73 |
| 4244 | cca-miR4244a | UUGUUGAUUCCUUGUAGAU    | UUG | 19 | 214 | 65.89 | 0.55 | 0.31 | 0.37 | 0.12 | 3.74 |
| 4245 | cca-miR4245a | AUUGUCAGUGUAAAACUUU    | AUU | 19 | 391 | 76.98 | 1.18 | 0.36 | 0.22 | 0.07 | 5.12 |
|      | cca-miR4245b | ACAAAGUUUUUAUACUAACAA  |     | 20 | 289 | 76.47 | 0.96 | 0.34 | 0.17 | 0.06 | 4.84 |
|      | cca-miR4245c | AUUGACAGUAUAAAAAUUGU   |     | 21 | 218 | 75.69 | 0.75 | 0.33 | 0.41 | 0.13 | 5.05 |
| 4246 | cca-miR4246a | UUAUCAAUAAAAAUUGGAUU   | UUU | 21 | 291 | 73.88 | 0.75 | 0.33 | 0.33 | 0.10 | 3.78 |
|      | cca-miR4246b | AAGCAAUGAAAAUUUGAUUU   |     | 20 | 427 | 76.11 | 0.85 | 0.32 | 0.41 | 0.13 | 3.04 |
| 4248 | cca-miR4248a | UGAUUGACAAAAAUAAAUG    | AAA | 20 | 334 | 69.16 | 0.60 | 0.29 | 0.40 | 0.12 | 2.69 |
|      | cca-miR4248b | ACAUGUUAUUUUUGGUAUCA   |     | 21 | 334 | 64.07 | 0.59 | 0.32 | 0.45 | 0.14 | 3.29 |
| 4249 | cca-miR4249a | UGAAUUUGAGAAUUUUAGGUA  | UUU | 21 | 466 | 75.32 | 0.71 | 0.29 | 0.50 | 0.14 | 4.72 |
| 4340 | cca-miR4340a | UGCAGAGAUAGCGACGGGCUUA | CUG | 22 | 59  | 45.76 | 0.59 | 0.32 | 0.15 | 0.05 | 5.08 |
| 4371 | cca-miR4371a | UCCGUCAACCACGUCAUCACUU | UGA | 22 | 242 | 66.94 | 1.11 | 0.37 | 0.17 | 0.06 | 3.31 |
|      | cca-miR4371b | AAGUGAUGACGUGAUAGACGGA |     | 22 | 419 | 72.08 | 1.32 | 0.38 | 0.20 | 0.08 | 3.34 |
| 4376 | cca-miR4376a | ACGCAGGAGAGAUGACGCUGU  | GCA | 21 | 112 | 50.89 | 1.03 | 0.38 | 0.03 | 0.01 | 4.46 |
|      | cca-miR4376b | CAGCGUCAUCUCUCCUGCGU   |     | 20 | 131 | 51.91 | 1.02 | 0.37 | 0.03 | 0.01 | 5.34 |
| 4413 | cca-miR4413a | CAGUGACUGACAAUUCUC     | AUU | 18 | 117 | 63.25 | 0.55 | 0.27 | 0.27 | 0.09 | 5.98 |
|      | cca-miR4413b | AAGAGAAUUGUAAGUCACU    |     | 19 | 144 | 64.58 | 0.65 | 0.30 | 0.15 | 0.06 | 4.17 |
| 4414 | cca-miR4414a | GAACCAACGAGUCAGCAGCU   | GCU | 20 | 117 | 53.85 | 0.59 | 0.28 | 0.23 | 0.07 | 2.56 |
| 4415 | cca-miR4415a | CAUUGAUUCUCAUCAAC      | AUC | 19 | 100 | 68.00 | 1.32 | 0.34 | 0.04 | 0.02 | 6.00 |
|      | cca-miR4415b | AAGUUGUGAUGGGAAUCAUG   |     | 21 | 123 | 64.23 | 1.30 | 0.36 | 0.03 | 0.01 | 4.88 |
| 5031 | cca-miR5031a | AAUGAUAAACAUCUAAUUU    | UAA | 19 | 345 | 67.25 | 0.64 | 0.30 | 0.31 | 0.10 | 2.90 |
|      | cca-miR5031b | AAUUAGAUGUUAUAUAUUA    |     | 19 | 479 | 66.18 | 0.72 | 0.33 | 0.38 | 0.13 | 2.92 |
|      | cca-miR5031c | UUAUUGAUUAAAAUUAUUU    |     | 21 | 399 | 76.94 | 0.80 | 0.30 | 0.43 | 0.13 | 6.27 |
|      | cca-miR5031d | AAAUUAGAAGUUACUCAUUA   |     | 21 | 70  | 75.71 | 0.88 | 0.29 | 0.24 | 0.09 | 5.71 |

|      |              |                          |     |    |     |       |      |      |      |      |      |
|------|--------------|--------------------------|-----|----|-----|-------|------|------|------|------|------|
| 5039 | cca-miR5039a | AUGCAUCGUUUAAAAAAGGG     | AUU | 20 | 262 | 66.41 | 0.48 | 0.29 | 0.50 | 0.14 | 3.82 |
| 5040 | cca-miR5040a | AUGAUAAAUCACAAGCAUGA     | AUA | 20 | 318 | 75.79 | 0.75 | 0.28 | 0.24 | 0.07 | 3.46 |
|      | cca-miR5040b | UCAUGCUUGUUUAUAUCA       |     | 19 | 434 | 76.04 | 0.89 | 0.35 | 0.38 | 0.13 | 3.23 |
| 5041 | cca-miR5041a | UGAUCAAGUUUAAGAUGAA      | UUG | 20 | 319 | 72.41 | 0.80 | 0.31 | 0.44 | 0.13 | 4.70 |
|      | cca-miR5041b | UUUCUUCUCCAACUUGCUCAA    |     | 21 | 402 | 74.38 | 0.72 | 0.31 | 0.28 | 0.09 | 3.48 |
| 5054 | cca-miR5054a | UCCCCACGGUGGGCGCCA       | GAU | 18 | 443 | 51.47 | 0.66 | 0.34 | 0.52 | 0.16 | 2.93 |
|      | cca-miR5054b | UGGCGCCCACCGUGGGGA       |     | 18 | 80  | 50.00 | 0.65 | 0.30 | 0.20 | 0.07 | 2.50 |
| 5055 | cca-miR5055a | UCGCUCCUGAGCUCGGCGU      | CUG | 19 | 278 | 44.24 | 0.65 | 0.32 | 0.48 | 0.16 | 2.52 |
| 5057 | cca-miR5057a | AAUUUUAAAUCAUUUUGAC      | AAA | 19 | 433 | 76.67 | 0.99 | 0.34 | 0.12 | 0.05 | 4.85 |
|      | cca-miR5057b | UCAAAAUGAUUUCAAAUUU      |     | 19 | 500 | 77.00 | 0.96 | 0.34 | 0.27 | 0.09 | 3.20 |
| 5075 | cca-miR5075a | CUCCGCCGCCGCCGUCCGC      | CCG | 19 | 388 | 27.58 | 0.68 | 0.35 | 0.19 | 0.07 | 5.67 |
| 5139 | cca-miR5139a | UGGUAAUAGAGCCAGGUU       | UAU | 18 | 120 | 70.00 | 0.81 | 0.32 | 0.16 | 0.06 | 5.83 |
| 5140 | cca-miR5140a | GCUGGUGAAAAUUUGGUG       | UGG | 18 | 287 | 62.37 | 0.71 | 0.33 | 0.32 | 0.10 | 2.79 |
| 5142 | cca-miR5142a | AUCACAUACAUAUCAAUAU      | UCA | 19 | 248 | 70.16 | 0.59 | 0.29 | 0.33 | 0.11 | 2.82 |
|      | cca-miR5142b | AUAUUGUUUAUAAGUGAU       |     | 19 | 459 | 72.98 | 0.78 | 0.32 | 0.37 | 0.11 | 3.70 |
| 5163 | cca-miR5163a | CCUAUCCUAAAUAUUUAAAA     | AUU | 21 | 279 | 67.38 | 0.49 | 0.29 | 0.44 | 0.13 | 3.23 |
|      | cca-miR5163b | UUUAAAUAUUUUAGGCUA       |     | 19 | 161 | 75.16 | 0.72 | 0.36 | 0.34 | 0.11 | 5.59 |
|      | cca-miR5163c | CACCUAACUGAAUAUUUA       |     | 19 | 413 | 69.73 | 0.64 | 0.30 | 0.31 | 0.10 | 3.63 |
| 5171 | cca-miR5171a | UUCUCCAUCCCAUAAUAAGU     | AUU | 21 | 453 | 76.82 | 0.82 | 0.30 | 0.38 | 0.12 | 5.74 |
| 5174 | cca-miR5174b | UUAUGGAACAAAGGGAGUA      | UUU | 19 | 152 | 76.97 | 0.81 | 0.30 | 0.13 | 0.05 | 5.26 |
| 5183 | cca-miR5183a | UUUGGACAAAUUUGUGUCA      | AUA | 19 | 99  | 70.71 | 0.79 | 0.35 | 0.20 | 0.09 | 4.04 |
| 5185 | cca-miR5185a | GCUUCUAAUCAAUUCUCAA      | UUC | 21 | 148 | 76.35 | 0.69 | 0.34 | 0.28 | 0.09 | 2.70 |
|      | cca-miR5185b | UUCUAGUUUAUUUUUCAA       |     | 19 | 91  | 76.92 | 0.80 | 0.32 | 0.11 | 0.04 | 4.40 |
|      | cca-miR5185c | AUUUAGAGAUAGACUUAGA      |     | 19 | 143 | 61.54 | 0.42 | 0.27 | 0.53 | 0.16 | 2.80 |
|      | cca-miR5185d | UUCUAAGUCCUUCUCUAAAUC    |     | 21 | 465 | 65.16 | 0.56 | 0.26 | 0.23 | 0.07 | 2.58 |
|      | cca-miR5185e | UUUGAUAAUUGAACUUGAAG     |     | 20 | 197 | 64.97 | 0.41 | 0.28 | 0.41 | 0.12 | 5.08 |
| 5201 | cca-miR5201a | UGAUCUUUUGCCUCACCCU      | UGA | 20 | 377 | 58.89 | 0.63 | 0.31 | 0.42 | 0.14 | 2.92 |
| 5205 | cca-miR5205a | CUUAUAAUUAGGGAUGGAGGGAGU | GGA | 24 | 200 | 73.00 | 0.55 | 0.33 | 0.44 | 0.14 | 2.50 |
| 5219 | cca-miR5219a | UCAUGGAAUUUCUGCUCUGCA    | AGG | 22 | 74  | 55.41 | 0.80 | 0.34 | 0.30 | 0.13 | 2.70 |
| 5234 | cca-miR5234a | UUUUGUUAUGGAUGGCUGAAG    | AUU | 21 | 387 | 62.79 | 0.67 | 0.31 | 0.42 | 0.13 | 4.13 |
| 5237 | cca-miR5237a | UCAAAAAUUUAGUUGGGA       | AUU | 19 | 268 | 62.69 | 0.56 | 0.33 | 0.38 | 0.11 | 3.36 |

|      |              |                           |     |    |     |       |      |      |      |      |      |
|------|--------------|---------------------------|-----|----|-----|-------|------|------|------|------|------|
| 5240 | cca-miR5240a | UUGAAAAAAUUUUGGGUUUG      | AAU | 20 | 153 | 72.55 | 1.10 | 0.35 | 0.11 | 0.05 | 2.61 |
|      | cca-miR5240b | AAAUCCCCAAUUUUUCAA        |     | 19 | 424 | 76.89 | 0.58 | 0.29 | 0.48 | 0.14 | 5.42 |
| 5248 | cca-miR5248a | UUUUUAGUUGGCAUGCAUUCA     | UUG | 21 | 153 | 61.44 | 0.69 | 0.36 | 0.27 | 0.10 | 4.58 |
| 5253 | cca-miR5253a | UGAAA AUGAUUGUGUUGGA      | GAU | 19 | 212 | 60.38 | 0.56 | 0.27 | 0.39 | 0.12 | 3.30 |
| 5255 | cca-miR5255a | UGACUUGAUAGAGGACAUGGG     | AUG | 21 | 500 | 65.00 | 0.71 | 0.32 | 0.40 | 0.12 | 2.60 |
|      | cca-miR5255b | CCCAUGUUCUCUAACAAGUCA     |     | 21 | 292 | 65.75 | 0.47 | 0.30 | 0.43 | 0.14 | 2.74 |
| 5256 | cca-miR5256a | UUAUCUUACAUAUCCAUA        | AAU | 21 | 372 | 74.73 | 0.68 | 0.32 | 0.31 | 0.10 | 3.76 |
|      | cca-miR5256b | UAAUGGAUUAGAUAAGAUUA      |     | 21 | 168 | 76.19 | 0.67 | 0.35 | 0.47 | 0.15 | 7.74 |
| 5257 | cca-miR5257a | AAGUAGAACCUUUUUCUG        | AAG | 19 | 235 | 71.06 | 0.94 | 0.34 | 0.15 | 0.05 | 2.98 |
|      | cca-miR5257b | CAGAAAAAGGUAUCUACUUGU     |     | 22 | 479 | 54.49 | 0.66 | 0.31 | 0.47 | 0.14 | 3.55 |
| 5260 | cca-miR5260a | AAGCCAUGUGAACAAUACA       | CAA | 19 | 255 | 64.31 | 0.49 | 0.26 | 0.37 | 0.11 | 3.53 |
|      | cca-miR5260b | UUUGUAUUGUUGCAAUGGCUU     |     | 21 | 423 | 71.39 | 0.61 | 0.32 | 0.38 | 0.11 | 2.84 |
| 5261 | cca-miR5261a | UCAUUGUAAAUGGCUUUGGCU     | AAU | 21 | 364 | 64.29 | 0.54 | 0.27 | 0.30 | 0.09 | 3.85 |
| 5264 | cca-miR5264a | UGAUCAUGGACUUUGCA         | UUG | 18 | 111 | 61.26 | 0.69 | 0.32 | 0.26 | 0.10 | 5.41 |
| 5265 | cca-miR5265a | AAGUGAUGUUGGAAUGGU        | GUU | 18 | 212 | 63.68 | 0.57 | 0.27 | 0.43 | 0.12 | 2.83 |
| 5281 | cca-miR5281a | CUCCCUCCGGUCCUUUAAUAAGA   | AAU | 24 | 94  | 64.89 | 1.54 | 0.39 | 0.03 | 0.01 | 3.19 |
|      | cca-miR5281b | UCUUAUAUAAAGGACUGGAGGGAG  |     | 24 | 395 | 73.92 | 0.97 | 0.32 | 0.34 | 0.10 | 4.81 |
| 5285 | cca-miR5285a | UGGGACUUAGGGUAGGAUUAGGCG  | UUG | 24 | 136 | 72.06 | 0.62 | 0.29 | 0.40 | 0.14 | 4.41 |
| 5288 | cca-miR5288a | CAGCUUUGAAGAACAUAAGGAAUUA | GAA | 24 | 362 | 61.60 | 0.61 | 0.28 | 0.49 | 0.14 | 3.31 |
| 5291 | cca-miR5291a | GUUUGAGGGAAGGAUUGGUUGGAU  | GAU | 24 | 437 | 75.29 | 0.71 | 0.29 | 0.21 | 0.06 | 2.52 |
| 5292 | cca-miR5292a | UCUUUGUUGCUCUCAGCUGAAUC   | GAU | 23 | 230 | 59.57 | 0.64 | 0.31 | 0.40 | 0.12 | 2.61 |
| 5368 | cca-miR5368a | GGACAGUCUCAGGUAGACA       | AGA | 19 | 172 | 45.35 | 0.77 | 0.34 | 0.33 | 0.11 | 2.91 |
| 5369 | cca-miR5369a | UGAGAAAAGGAGAAUGU         | UGA | 17 | 118 | 71.19 | 0.79 | 0.36 | 0.15 | 0.05 | 3.39 |
|      | cca-miR5369b | UGAGAUAAUGAGGAUGUCA       |     | 19 | 59  | 71.19 | 0.66 | 0.34 | 0.19 | 0.06 | 8.47 |
| 5372 | cca-miR5372a | UGUUUGAUAAAACUGUUGU       | UGU | 19 | 454 | 75.55 | 0.70 | 0.34 | 0.57 | 0.16 | 4.63 |
| 5373 | cca-miR5373a | UCUCUUGAUUCUAGAUGAUGU     | AGA | 21 | 466 | 64.59 | 0.62 | 0.30 | 0.44 | 0.13 | 3.00 |
| 5374 | cca-miR5374a | UUAUAAUCCGACAUCUGGAAU     | AAU | 21 | 330 | 63.94 | 0.56 | 0.29 | 0.49 | 0.14 | 4.55 |
| 5379 | cca-miR5379a | GAUAUCAAAGGGAUGAUUUUCAU   | AUU | 24 | 341 | 76.54 | 0.71 | 0.33 | 0.45 | 0.14 | 4.11 |
| 5382 | cca-miR5382a | AGGGCCUGUUUAGAU           | AAA | 15 | 260 | 74.23 | 0.89 | 0.35 | 0.20 | 0.07 | 4.23 |
| 5512 | cca-miR5512a | GAUAUGGUA AUGCUAAAA       | AAU | 18 | 444 | 72.30 | 0.57 | 0.29 | 0.35 | 0.10 | 6.76 |
|      | cca-miR5512b | UUUUAGCAUACCAAUCCUA       |     | 21 | 71  | 73.24 | 0.85 | 0.37 | 0.21 | 0.08 | 5.63 |

|      |              |                         |     |    |     |       |      |      |      |      |      |
|------|--------------|-------------------------|-----|----|-----|-------|------|------|------|------|------|
| 5521 | cca-miR5521a | AUCAGAU AUGCAGCCACU     | UGA | 18 | 465 | 66.24 | 0.81 | 0.31 | 0.31 | 0.10 | 3.44 |
| 5523 | cca-miR5523a | UGAGGAGGAACGU AUUUACUAG | AUU | 22 | 80  | 71.25 | 0.91 | 0.30 | 0.06 | 0.02 | 2.50 |
| 5532 | cca-miR5532a | AUGGAAUAUAUGACAAAGGU    | UAU | 20 | 234 | 73.93 | 0.72 | 0.33 | 0.49 | 0.14 | 7.26 |
| 5555 | cca-miR5555a | CAAAGUAAUAUUAUUCUCUU    | UAU | 20 | 429 | 73.19 | 0.61 | 0.29 | 0.35 | 0.12 | 5.36 |
| 5558 | cca-miR5558a | GAUAGACUUAUAAUUUGAAA    | AUU | 20 | 384 | 68.49 | 0.52 | 0.28 | 0.38 | 0.11 | 4.17 |
| 5559 | cca-miR5559a | UACUUAGUGAACUGUUGGAUC   | AUU | 21 | 346 | 63.87 | 0.49 | 0.30 | 0.29 | 0.09 | 3.76 |
|      | cca-miR5559b | GAUCCAACAAUUCACUAAGUA   |     | 21 | 181 | 66.30 | 1.02 | 0.34 | 0.13 | 0.05 | 2.76 |
| 5561 | cca-miR5561a | UCCAUUUAGUGAGAGAAAGAC   | AAU | 21 | 283 | 74.56 | 0.72 | 0.34 | 0.34 | 0.12 | 3.53 |
| 5565 | cca-miR5565a | UGUUUGAAUGAUGUCGGA      | AAU | 19 | 252 | 76.98 | 0.56 | 0.31 | 0.45 | 0.14 | 5.16 |
|      | cca-miR5565b | UGAUAAAAAUCCGACUA       |     | 18 | 214 | 68.22 | 0.55 | 0.29 | 0.31 | 0.10 | 4.21 |
| 5568 | cca-miR5568a | CAAAGCUAUGUACCGAGAAA    | UAU | 21 | 157 | 76.43 | 0.66 | 0.31 | 0.31 | 0.12 | 8.28 |
|      | cca-miR5568b | CUUACAGUUAGGAAUGGAGG    |     | 20 | 504 | 76.79 | 0.77 | 0.32 | 0.34 | 0.11 | 4.96 |
|      | cca-miR5568c | AAAGUUAUGUAUGUAGAAA     |     | 20 | 488 | 72.75 | 0.73 | 0.30 | 0.38 | 0.12 | 3.07 |
|      | cca-miR5568d | UCUAGAAAAGCUAAGACGU     |     | 19 | 237 | 67.51 | 0.62 | 0.30 | 0.49 | 0.16 | 3.80 |
|      | cca-miR5568e | GAUGUUUUGAGUUUUUAUAGAU  |     | 21 | 487 | 72.07 | 0.69 | 0.33 | 0.24 | 0.08 | 2.87 |
|      | cca-miR5568f | CAAUUUUAAAAUGUUUUGG     |     | 20 | 370 | 71.89 | 0.65 | 0.29 | 0.43 | 0.13 | 3.24 |
| 5668 | cca-miR5668g | CAGUCUCUAAUCCGUUGCU     | AAG | 20 | 146 | 72.60 | 0.70 | 0.34 | 0.20 | 0.07 | 2.74 |
| 5672 | cca-miR5672a | CAUGGUAAUGGAAGAAAUGGA   | AAU | 21 | 146 | 71.23 | 1.10 | 0.37 | 0.32 | 0.10 | 3.42 |
| 5712 | cca-miR5712a | CUCACCAAUUGUAUUAUUAU    | AUU | 21 | 412 | 70.15 | 0.44 | 0.27 | 0.37 | 0.11 | 5.10 |
|      | cca-miR5712b | AAUAUUAUUUAAUUAUGUGA    |     | 20 | 465 | 72.26 | 0.77 | 0.31 | 0.27 | 0.09 | 6.24 |
| 5716 | cca-miR5716a | UUUAGAUCUUCAAUUAAGCCAA  | UUC | 21 | 422 | 69.19 | 0.51 | 0.27 | 0.37 | 0.11 | 2.61 |
| 5721 | cca-miR5721a | CCAUUUUUCUCUCCAUUUUU    | UUU | 20 | 459 | 59.91 | 0.62 | 0.27 | 0.28 | 0.08 | 3.27 |
|      | cca-miR5721b | AAAAAUGGAGUGAGAAA       |     | 18 | 60  | 76.67 | 0.92 | 0.32 | 0.14 | 0.04 | 5.00 |
| 5722 | cca-miR5722a | AAAUAGAGUAAUGUGGAACG    | AUU | 20 | 471 | 69.85 | 0.71 | 0.34 | 0.30 | 0.10 | 5.52 |
| 5741 | cca-miR5741a | AAACCAUCAAAUUGGUCCUA    | AUU | 21 | 180 | 73.89 | 0.68 | 0.29 | 0.38 | 0.10 | 5.00 |
|      | cca-miR5741b | UAGGGACUAAAUGAUGGUUU    |     | 21 | 278 | 69.42 | 1.23 | 0.36 | 0.15 | 0.05 | 4.68 |
| 5745 | cca-miR5745a | UUUAAUUUAUAUGCAUCGUCA   | CAU | 21 | 78  | 76.92 | 0.72 | 0.32 | 0.20 | 0.07 | 3.85 |
| 5757 | cca-miR5757a | UAGAUUUUGUUUAACAGC      | AAU | 19 | 398 | 75.63 | 0.73 | 0.29 | 0.45 | 0.13 | 5.28 |
| 5770 | cca-miR5770a | GGACUAUGGUUUGGACAA      | UUG | 18 | 447 | 52.80 | 0.69 | 0.34 | 0.36 | 0.13 | 2.91 |
| 5773 | cca-miR5773a | ACCUAACUUAACCUUAUAAAA   | AAA | 21 | 68  | 67.65 | 0.95 | 0.32 | 0.08 | 0.03 | 2.94 |
| 5775 | cca-miR5775a | AAGCGCUUUUGAGAGCUUC     | UCU | 19 | 363 | 72.73 | 1.28 | 0.37 | 0.07 | 0.03 | 2.75 |



|      |              |                        |     |    |     |       |      |      |      |      |      |
|------|--------------|------------------------|-----|----|-----|-------|------|------|------|------|------|
| 5778 | cca-miR5778a | CGACGAUCUCUUCGUCGACAUC | UCG | 22 | 58  | 48.28 | 0.66 | 0.33 | 0.18 | 0.06 | 6.90 |
| 5828 | cca-miR5828a | GAUUUACAUUUAUUGCCGUA   | UAA | 20 | 188 | 65.43 | 0.49 | 0.30 | 0.19 | 0.06 | 3.19 |
| 5837 | cca-miR5837a | UGUUGGAAAGACAUGCAGC    | AUG | 19 | 189 | 68.25 | 0.67 | 0.30 | 0.41 | 0.13 | 4.23 |
| 6025 | cca-miR6025a | GAUGUUGUUCAAUUGUUGGUA  |     | 22 | 489 | 72.80 | 0.79 | 0.30 | 0.25 | 0.08 | 3.89 |
|      | cca-miR6025b | UCAAUUGGGGAUGACUUCUAGU |     | 21 | 427 | 62.76 | 0.73 | 0.34 | 0.34 | 0.11 | 4.68 |
|      | cca-miR6025c | AUGUCACCUCUAAAAUUGGCA  | UUG | 21 | 446 | 65.47 | 0.66 | 0.31 | 0.34 | 0.10 | 4.26 |
| 6034 | cca-miR6034a | UGAUGUGUAUAGCUUUGGG    | UAU | 19 | 75  | 54.67 | 0.76 | 0.32 | 0.06 | 0.02 | 4.00 |
| 6111 | cca-miR6111a | GUCAUAAAUCGUGACCUAAAG  | AUG | 21 | 491 | 71.69 | 0.68 | 0.32 | 0.32 | 0.10 | 2.65 |
| 6135 | cca-miR6135a | GGUAAGUUGGUUAAUUGA     | AUU | 18 | 501 | 66.67 | 0.64 | 0.34 | 0.37 | 0.10 | 4.19 |
|      | cca-miR6135b | GAGUAAGUUGGUCAUUUGG    |     | 19 | 496 | 73.39 | 0.74 | 0.33 | 0.34 | 0.10 | 4.44 |
| 6140 | cca-miR6140a | AUGUUUGUAAAUAGUUUGUGU  | UUG | 21 | 59  | 76.27 | 0.44 | 0.36 | 0.37 | 0.13 | 5.08 |
| 6148 | cca-miR6148a | AGAACAUCGAUCGUCGUA     | GUU | 19 | 431 | 64.04 | 0.65 | 0.31 | 0.42 | 0.12 | 2.55 |
| 6169 | cca-miR6169a | AGAGAGAAAUAUAAAACU     | AAU | 20 | 147 | 76.87 | 0.82 | 0.33 | 0.41 | 0.13 | 3.40 |
|      | cca-miR6169b | UAGUAUUUAUCUUUUCUCU    |     | 19 | 468 | 65.38 | 0.80 | 0.33 | 0.20 | 0.06 | 2.56 |
| 6173 | cca-miR6173a | AGUAUCCAUCGUUUACGGCU   | AGC | 20 | 113 | 46.02 | 0.53 | 0.33 | 0.25 | 0.08 | 2.65 |
| 6182 | cca-miR6182a | UGAGUGUGUGAAUGAUGGCUUU | CAA | 22 | 88  | 55.68 | 0.58 | 0.34 | 0.24 | 0.09 | 3.41 |
| 6191 | cca-miR6191a | UUCAUAUCUAGAUAAAUCU    | AUU | 19 | 97  | 72.16 | 0.85 | 0.34 | 0.07 | 0.03 | 3.09 |
| 6196 | cca-miR6196a | UCCUCUCCCUCUCCUCCUCCU  | GAG | 21 | 503 | 46.92 | 0.63 | 0.28 | 0.27 | 0.09 | 2.58 |
| 6202 | cca-miR6202a | UCAAUGUAUAAAUCUUC      | UGU | 19 | 384 | 67.97 | 0.55 | 0.25 | 0.37 | 0.11 | 4.43 |
|      | cca-miR6202b | AAGAUUUUAAGAAUUGAA     |     | 18 | 394 | 72.59 | 0.76 | 0.34 | 0.33 | 0.10 | 2.54 |
| 6218 | cca-miR6218a | ACAAGUUUCUUGAUUCUUGG   | AAA | 20 | 398 | 72.86 | 0.62 | 0.30 | 0.45 | 0.13 | 4.02 |
|      | cca-miR6218b | CCAAAAUCAAGAAACUUG     |     | 19 | 471 | 69.85 | 0.62 | 0.28 | 0.35 | 0.11 | 2.97 |
| 6230 | cca-miR6230a | CAAGCUUAGGGACCCAAAA    | AAA | 19 | 141 | 76.60 | 0.71 | 0.34 | 0.28 | 0.10 | 2.84 |
| 6231 | cca-miR6231a | UAUUUUUGGGCUCAUGGACAU  | UGG | 21 | 156 | 58.33 | 0.63 | 0.31 | 0.19 | 0.07 | 3.85 |
| 6232 | cca-miR6232a | CAAUACAAUGUACCAAAA     | AUA | 19 | 235 | 76.60 | 0.65 | 0.27 | 0.42 | 0.14 | 5.11 |
|      | cca-miR6232b | UUUUUGGUACUUUGAAUUU    |     | 19 | 463 | 76.03 | 0.68 | 0.31 | 0.36 | 0.10 | 3.02 |
| 6271 | cca-miR6271a | CAUUGUAUCUCUCAUAUUGA   | UCU | 21 | 340 | 72.94 | 0.63 | 0.30 | 0.42 | 0.13 | 2.65 |
| 6281 | cca-miR6281a | UUAGAGAGAGAGAGUGAG     | GAG | 20 | 454 | 55.73 | 0.67 | 0.32 | 0.32 | 0.10 | 3.52 |
|      | cca-miR6281b | CUCACUCUCUCUAUGUCUAA   |     | 20 | 378 | 56.61 | 0.55 | 0.26 | 0.18 | 0.06 | 3.17 |
| 6288 | cca-miR6288a | AAUCAAUUAGAAACUAACAA   | UUA | 20 | 413 | 77.00 | 0.75 | 0.31 | 0.36 | 0.11 | 3.39 |
|      | cca-miR6288b | UUGUAAUUUUUUUAUUGAUU   |     | 20 | 371 | 73.05 | 0.67 | 0.30 | 0.42 | 0.12 | 2.96 |

|      |              |                        |     |    |     |       |      |      |      |      |      |
|------|--------------|------------------------|-----|----|-----|-------|------|------|------|------|------|
|      | cca-miR6288c | UUGUUAUUUUUAUAAUGGAUU  |     | 20 | 126 | 73.81 | 0.70 | 0.32 | 0.31 | 0.11 | 5.56 |
|      | cca-miR6288d | CUUGUUAUUUUUAUUUGAU    |     | 20 | 130 | 75.38 | 0.83 | 0.35 | 0.15 | 0.06 | 6.15 |
|      | cca-miR6288e | CUAGCCACUUGUCCUUUUC    |     | 19 | 184 | 65.76 | 0.66 | 0.33 | 0.16 | 0.06 | 3.26 |
| 6291 | cca-miR6291a | CUUACCAUGUUUUUAUACCA   | UAU | 20 | 81  | 72.84 | 0.81 | 0.27 | 0.20 | 0.08 | 3.70 |
| 6299 | cca-miR6299a | AUUUAAAAUAAUUAAUUUGUCA | AUU | 22 | 318 | 76.73 | 0.77 | 0.30 | 0.36 | 0.10 | 8.81 |
|      | cca-miR6299b | UGACAAUUCAAUAAUUUGAAAU |     | 22 | 444 | 76.35 | 0.79 | 0.32 | 0.47 | 0.14 | 6.98 |
| 6300 | cca-miR6300a | CCACUAUACUACAACGAC     | AUA | 18 | 452 | 71.68 | 0.78 | 0.33 | 0.31 | 0.10 | 3.10 |
|      | cca-miR6300b | GUCGUUGUAGUAUAGUGG     |     | 18 | 311 | 63.99 | 0.58 | 0.27 | 0.36 | 0.11 | 2.89 |
| 6443 | cca-miR6443a | CAUCAUCUAUGAUCAUAC     | AAA | 18 | 457 | 62.80 | 0.56 | 0.25 | 0.23 | 0.07 | 4.16 |
| 6449 | cca-miR6449a | CAUGGUUCUGAAUAAUGGUU   | GUU | 20 | 317 | 68.14 | 0.66 | 0.33 | 0.40 | 0.12 | 3.47 |
| 6457 | cca-miR6457a | UUAGUUGGGCACCCUCUUCU   | AGA | 20 | 216 | 63.43 | 0.67 | 0.30 | 0.35 | 0.11 | 3.24 |
| 6459 | cca-miR6459a | GAUCGAAUUUGGUCUUGAGA   | AAG | 20 | 363 | 65.84 | 0.74 | 0.34 | 0.52 | 0.16 | 3.31 |
| 6462 | cca-miR6462a | AAGGGACAACAUGGCCUAAG   | AAG | 21 | 123 | 60.98 | 0.74 | 0.31 | 0.16 | 0.05 | 3.25 |
| 6464 | cca-miR6464a | UGAUUGUUUGUUGGAUUAU    | UAU | 21 | 277 | 68.23 | 0.56 | 0.34 | 0.38 | 0.11 | 3.61 |
|      | cca-miR6464b | AAUAUCCAACAAGAAAUCA    |     | 19 | 106 | 68.87 | 0.66 | 0.36 | 0.14 | 0.05 | 2.83 |
| 6466 | cca-miR6466a | CUGGUAUGAGCAUAGAUGA    | AAU | 20 | 428 | 68.93 | 0.63 | 0.27 | 0.36 | 0.11 | 4.67 |
| 6470 | cca-miR6470a | UCUGAUGUCAUUAUAAAAA    | UUG | 19 | 98  | 71.43 | 0.74 | 0.35 | 0.15 | 0.06 | 3.06 |
|      | cca-miR6470b | UUUUUAAUAUGACAUCAGAG   |     | 20 | 408 | 75.49 | 0.87 | 0.32 | 0.48 | 0.15 | 2.70 |
|      | cca-miR6470c | UUUUCUAAGAUGAUUCAGAG   |     | 21 | 455 | 66.59 | 0.70 | 0.30 | 0.47 | 0.14 | 2.86 |
| 6476 | cca-miR6476a | AGUGGAGAUGAUACAUGA     | AUG | 18 | 476 | 62.82 | 0.63 | 0.29 | 0.31 | 0.09 | 2.94 |
| 6478 | cca-miR6478a | ACCAACUGAGCUAAGGUCGG   | UUG | 20 | 180 | 67.22 | 0.58 | 0.31 | 0.41 | 0.13 | 3.33 |
| 6483 | cca-miR6483a | UAUUGUAGAAAGUUUAAGGAU  | AUU | 21 | 284 | 73.59 | 0.74 | 0.33 | 0.28 | 0.09 | 5.99 |
| 6485 | cca-miR6485a | UAGGAUGUAGAAGAUCAUAA   | AUU | 20 | 394 | 67.51 | 0.75 | 0.29 | 0.24 | 0.07 | 2.79 |
| 7124 | cca-miR7124a | AAAUAAAGUCAAUUUGGUG    | AUU | 20 | 464 | 67.24 | 0.64 | 0.32 | 0.47 | 0.14 | 3.45 |
| 7125 | cca-miR7125a | AUUGAUCUUGUUGCACCUA    | CAA | 19 | 465 | 67.10 | 0.58 | 0.29 | 0.55 | 0.17 | 3.23 |
| 7127 | cca-miR7127a | UAUGACAAUUCUUUGAGUAU   | AAU | 21 | 182 | 72.53 | 0.68 | 0.31 | 0.38 | 0.13 | 3.85 |
| 7484 | cca-miR7484a | UUUGUAUAUUAGUCAAUAGCA  | AUU | 23 | 226 | 76.11 | 0.62 | 0.32 | 0.40 | 0.12 | 7.08 |
| 7488 | cca-miR7488a | UUUUGUCCCUAGUCAAAA     | AUU | 21 | 384 | 67.71 | 0.55 | 0.26 | 0.47 | 0.15 | 3.91 |
| 7508 | cca-miR7508a | CAAGAAAAGAAGUCUGGAG    | CUU | 19 | 493 | 51.93 | 0.68 | 0.31 | 0.31 | 0.10 | 3.04 |
| 7516 | cca-miR7516a | GCGGGUAUCUUCGCCUCUGA   | AUU | 20 | 79  | 50.63 | 0.90 | 0.37 | 0.11 | 0.04 | 2.53 |
| 7532 | cca-miR7532a | GAAGCUGCGUCUGGUGGUGGU  | GGU | 21 | 310 | 61.61 | 0.72 | 0.34 | 0.43 | 0.14 | 2.58 |

|      |              |                         |     |    |     |       |      |      |      |      |      |
|------|--------------|-------------------------|-----|----|-----|-------|------|------|------|------|------|
| 7534 | cca-miR7534a | GCAACUUGACUAUAGUUUGAC   | UUG | 21 | 465 | 62.58 | 0.67 | 0.32 | 0.50 | 0.14 | 4.30 |
| 7535 | cca-miR7535a | ACCACACUCACAUUUUC       | UGU | 17 | 152 | 63.16 | 0.69 | 0.32 | 0.22 | 0.07 | 3.29 |
|      | cca-miR7535b | GAAAUGUGAGUGUGGU        |     | 17 | 497 | 62.17 | 0.61 | 0.29 | 0.46 | 0.14 | 3.42 |
| 7540 | cca-miR7540a | UGAU AUGAUUAAUGAUGUGA   | UGA | 20 | 273 | 76.92 | 0.65 | 0.26 | 0.36 | 0.10 | 2.93 |
| 7543 | cca-miR7543a | UUAAAGAUACAUAUUUGAC     | UUU | 19 | 497 | 76.46 | 0.80 | 0.33 | 0.35 | 0.11 | 3.82 |
|      | cca-miR7543b | UAAUUUAUCAUGUUUGACU     |     | 19 | 389 | 72.49 | 0.62 | 0.29 | 0.55 | 0.15 | 2.57 |
| 7545 | cca-miR7545a | CACUUUAGCUUCCCAA        | AUU | 17 | 158 | 60.76 | 0.45 | 0.28 | 0.39 | 0.12 | 2.53 |
| 7696 | cca-miR7696a | UCAAGUUCUCACACUUCAAA    | UUC | 20 | 208 | 70.19 | 0.48 | 0.27 | 0.43 | 0.13 | 5.77 |
| 7699 | cca-miR7699a | GUGUAAUUAAGCAUUAUUAAU   | AAU | 20 | 73  | 75.34 | 0.91 | 0.34 | 0.05 | 0.02 | 8.22 |
|      | cca-miR7699b | GUGUUAUCA AUGCAUUAUUAAU |     | 19 | 362 | 67.13 | 0.57 | 0.29 | 0.47 | 0.14 | 5.80 |
|      | cca-miR7699c | UUAAUGCAUUGAUUACACA     |     | 19 | 81  | 74.07 | 0.80 | 0.31 | 0.23 | 0.08 | 6.17 |
| 7701 | cca-miR7701a | UUUAUAUUCAUUAUUUAAU     | AAU | 20 | 459 | 74.95 | 0.61 | 0.30 | 0.48 | 0.13 | 4.79 |
|      | cca-miR7701b | UUUUAGAUUGAUUUUUUUAAU   |     | 21 | 299 | 75.25 | 0.70 | 0.31 | 0.37 | 0.11 | 4.68 |
|      | cca-miR7701c | AUUAAAUGAAUGAAUAUAAA    |     | 20 | 453 | 76.82 | 0.66 | 0.31 | 0.35 | 0.10 | 7.95 |
|      | cca-miR7701d | AUUAAGUGAGUGAAUCUAAA    |     | 20 | 209 | 76.56 | 0.72 | 0.33 | 0.43 | 0.15 | 4.78 |
| 7728 | cca-miR7728a | CUGCUUGACUUGACUGUAUU    | AUU | 20 | 477 | 60.80 | 0.61 | 0.28 | 0.50 | 0.14 | 3.14 |
| 7736 | cca-miR7736a | UGUGACAUCUUGAUAGUAA     | UGA | 20 | 458 | 62.45 | 0.56 | 0.31 | 0.24 | 0.08 | 3.06 |
| 7741 | cca-miR7741a | UCUUGAAUUUUCGCAUGCAG    | CAU | 20 | 64  | 57.81 | 0.52 | 0.30 | 0.12 | 0.04 | 3.13 |
| 7742 | cca-miR7742a | UGUGUGAAUGAGGGAAUGA     | AUU | 19 | 289 | 65.05 | 0.71 | 0.33 | 0.32 | 0.10 | 3.72 |
|      | cca-miR7742a | UCAUUCUUCAUUCACACA      |     | 19 | 430 | 52.09 | 0.56 | 0.30 | 0.45 | 0.13 | 4.84 |
| 7745 | cca-miR7745a | AGGCUUUAGUAAUCAAGAGAU   | AAG | 21 | 361 | 64.82 | 0.61 | 0.30 | 0.48 | 0.15 | 3.05 |
| 7753 | cca-miR7753a | GAUGAACAAGGCAGAAGACAU   | UCU | 21 | 446 | 59.64 | 0.54 | 0.29 | 0.54 | 0.16 | 3.81 |
| 7757 | cca-miR7757a | GUAGUUGAAGUUUUUGUUUA    | UAG | 20 | 225 | 76.00 | 0.61 | 0.34 | 0.31 | 0.10 | 3.56 |
| 7767 | cca-miR7767a | ACCUGCAAGCUUCUUGCUCU    | AGC | 21 | 277 | 58.48 | 0.71 | 0.30 | 0.36 | 0.12 | 2.89 |
| 7776 | cca-miR7776a | CAUUCAUAAUGAGUUGAAU     | AUG | 19 | 398 | 71.61 | 0.68 | 0.30 | 0.35 | 0.11 | 2.51 |
|      | cca-miR7776b | UUAAUUAUGAGUUGAAUGU     |     | 19 | 498 | 59.84 | 0.70 | 0.34 | 0.49 | 0.15 | 3.41 |
| 7812 | cca-miR7812a | CACUUCAUUAUUCAUAACAG    | AAU | 21 | 502 | 67.13 | 0.66 | 0.30 | 0.31 | 0.09 | 4.58 |
| 7814 | cca-miR7814a | UAGAUAGUUUGUAUGCUUUG    | AAA | 20 | 429 | 69.70 | 0.61 | 0.33 | 0.38 | 0.12 | 2.56 |
| 7816 | cca-miR7816a | AAUGUUGUUAUGAACUCUGUA   | AAU | 21 | 501 | 75.45 | 0.62 | 0.28 | 0.50 | 0.14 | 5.99 |
| 7817 | cca-miR7817a | UUUGGUUGUUGUCUUGAGACA   | UCU | 21 | 84  | 60.71 | 0.74 | 0.33 | 0.09 | 0.04 | 5.95 |
| 7822 | cca-miR7822a | UACCUUUUGUUCAACUCAA     | AUU | 20 | 370 | 65.95 | 0.52 | 0.28 | 0.44 | 0.13 | 3.24 |

|      |              |                          |     |    |     |       |      |      |      |      |      |
|------|--------------|--------------------------|-----|----|-----|-------|------|------|------|------|------|
|      | cca-miR7822b | UUUGAAAUUGAUUAAAUGGUA    |     | 21 | 342 | 76.32 | 0.77 | 0.32 | 0.33 | 0.09 | 4.97 |
| 7823 | cca-miR7823a | AUUUCAAAUACAUGCAUGCA     | AUU | 20 | 419 | 74.70 | 0.69 | 0.31 | 0.46 | 0.14 | 2.63 |
|      | cca-miR7823b | UGCAUGCAUGAAGUUGAAAU     |     | 20 | 288 | 72.57 | 0.74 | 0.27 | 0.30 | 0.09 | 3.82 |
| 7834 | cca-miR7834a | UAAUAAAUCUUCACUAUUAU     | AAU | 21 | 184 | 64.67 | 0.50 | 0.29 | 0.35 | 0.11 | 3.26 |
|      | cca-miR7834b | AUAAUAGUCAAGAUUUUUAU     |     | 20 | 123 | 67.48 | 0.53 | 0.31 | 0.42 | 0.15 | 3.25 |
| 7982 | cca-miR7982b | AAGUUGGAUGAUAAUAAAUAUA   | AUA | 23 | 498 | 76.91 | 1.00 | 0.34 | 0.20 | 0.07 | 3.21 |
| 8005 | cca-miR8005a | ACUCUAAAUUCUAAAUUCUAAA   | UUA | 22 | 194 | 69.07 | 0.57 | 0.33 | 0.31 | 0.10 | 3.09 |
|      | cca-miR8005b | UUUAGGGUUUACGGUUUAGGGUUU |     | 24 | 321 | 60.75 | 0.60 | 0.36 | 0.33 | 0.10 | 7.17 |
|      | cca-miR8005c | AAACACUACACCUUAAACCCUAAA |     | 24 | 448 | 68.08 | 0.89 | 0.36 | 0.36 | 0.12 | 7.59 |
|      | cca-miR8005d | UUUAGAGUAUAAUGUUUAUAGUUU |     | 24 | 260 | 70.38 | 0.67 | 0.36 | 0.47 | 0.14 | 3.85 |
| 8007 | cca-miR8007a | GAAAUAUGAAAAGUGCCACAUA   | UUU | 22 | 418 | 74.64 | 0.65 | 0.30 | 0.50 | 0.14 | 4.55 |
| 8011 | cca-miR8011a | CUCAUUUUUAUCUCAUAAAAA    | AAA | 21 | 55  | 76.36 | 1.54 | 0.31 | 0.03 | 0.01 | 3.64 |
|      | cca-miR8011b | ACUCAUUUUUGUCUCGCAAAAA   |     | 22 | 400 | 76.75 | 0.72 | 0.31 | 0.34 | 0.10 | 4.75 |
|      | cca-miR8011c | UUUUUAUGAGAGAAAAAUGAG    |     | 21 | 485 | 73.20 | 0.70 | 0.32 | 0.48 | 0.15 | 3.30 |
| 8014 | cca-miR8014a | AUUGUUUUUAUUAUUUAUUUAUUU | UGU | 24 | 249 | 76.31 | 0.86 | 0.32 | 0.19 | 0.06 | 2.81 |
| 8030 | cca-miR8030a | AUUUGGGUUGAAUUGGUGUUA    | UUG | 22 | 469 | 75.05 | 0.91 | 0.34 | 0.23 | 0.08 | 6.40 |
| 8035 | cca-miR8035a | UCCAGCUUCAUAUCUCUUUCU    | AUU | 22 | 407 | 57.99 | 0.63 | 0.30 | 0.33 | 0.10 | 2.70 |
| 8040 | cca-miR8040a | GAUCAAAAUACAUAUAUA       | AAU | 19 | 328 | 75.00 | 0.81 | 0.30 | 0.33 | 0.10 | 5.18 |
|      | cca-miR8040b | UUAUAAUUAUAUUUAUGAUC     |     | 20 | 112 | 71.43 | 0.84 | 0.33 | 0.10 | 0.04 | 2.68 |
|      | cca-miR8040c | UUAUAAUUGUAAUUUUGAU      |     | 19 | 450 | 76.89 | 0.81 | 0.32 | 0.28 | 0.09 | 8.00 |
|      | cca-miR8040d | GAUCAUAAUCAUAAUUAUA      |     | 20 | 478 | 71.76 | 0.64 | 0.32 | 0.46 | 0.15 | 3.35 |
| 8041 | cca-miR8041a | GCUUUGC UAAUUUCAUUG      | AUU | 18 | 231 | 62.77 | 0.59 | 0.31 | 0.41 | 0.12 | 4.33 |
|      | cca-miR8041b | GUGCAUUGC UAUUAUCAU      |     | 19 | 360 | 61.39 | 0.47 | 0.25 | 0.47 | 0.13 | 3.89 |
|      | cca-miR8041c | AAUGAAAUGGCAAAGCA        |     | 18 | 445 | 76.85 | 0.62 | 0.27 | 0.38 | 0.11 | 5.62 |
| 8044 | cca-miR8044a | UUUCAAAUCUUGUUGGAGAUG    | AUG | 21 | 76  | 63.16 | 0.57 | 0.38 | 0.12 | 0.05 | 2.63 |
| 8047 | cca-miR8047a | CCAUGUUUUGAAUUAGACC      | UUU | 21 | 264 | 74.62 | 0.84 | 0.31 | 0.27 | 0.09 | 3.41 |
| 8049 | cca-miR8049a | AUCAAGCUCAUGUAGACAU      | AUG | 19 | 95  | 64.21 | 0.65 | 0.32 | 0.12 | 0.04 | 3.16 |
| 8051 | cca-miR8051a | AAUAGUAUGGUGAAAGAAUA     | AUU | 21 | 200 | 68.50 | 0.50 | 0.28 | 0.39 | 0.12 | 3.50 |
|      | cca-miR8051b | UAUUUCUUCUACAUAUUUAU     |     | 21 | 199 | 76.88 | 0.61 | 0.31 | 0.44 | 0.13 | 6.03 |
| 8123 | cca-miR8123a | CUUGAGCAAUGGCAC          | UUG | 15 | 215 | 48.37 | 0.71 | 0.34 | 0.36 | 0.12 | 4.19 |
| 8140 | cca-miR8140a | UGAAGCUAAAGUGUUGAAAAG    | AAU | 21 | 465 | 76.99 | 0.86 | 0.34 | 0.35 | 0.12 | 5.59 |

|  |              |                      |  |    |     |       |      |      |      |      |      |
|--|--------------|----------------------|--|----|-----|-------|------|------|------|------|------|
|  | cca-miR8140b | UGAAGCUCAAGUCUUUAAAA |  | 20 | 268 | 70.90 | 0.60 | 0.30 | 0.47 | 0.14 | 3.73 |
|--|--------------|----------------------|--|----|-----|-------|------|------|------|------|------|

<sup>a</sup>Conserved SSR signature sequence of the miRNA family.

<sup>b</sup>Length of mature miRNA sequence.

<sup>c</sup>Length of precursor miRNA.

<sup>d</sup>Percentage AU content of precursor miRNA.

<sup>e</sup>Minimum Folding Energy Index of precursor miRNA.

<sup>f</sup>Normalized base-pairing propensity of precursor miRNA.

<sup>g</sup>Normalised Shannon entropy of precursor miRNA.

<sup>h</sup>Normalized base-pair distance of precursor miRNA.

<sup>i</sup>SSR signature repeats per 100 nucleotides of precursor miRNA.
