# Supplementary material for: Genome-wide identification of miRNAs and lncRNAs in Cajanus cajan
Source: PubMed Central journal article supplement (PMC5688659; doi:10.1186/s12864-017-4232-2), 2017-11-15
Supplement: 12864_2017_4232_MOESM2_ESM.pdf [file 12864_2017_4232_MOESM2_ESM.pdf]

**Table S2 - Predicted targets of *C. cajan* miRNAs.**

| Family                                            | miRNA                           | Target Protein                                          | Locus (or Loci)                 | Mode of Action                           |                             |   |
|---------------------------------------------------|---------------------------------|---------------------------------------------------------|---------------------------------|------------------------------------------|-----------------------------|---|
| 156                                               | cca-miR156b                     | Squamosa promoter-binding protein                       | CcLG11:33212797:33215770:1      | C                                        |                             |   |
| 158                                               | cca-miR158b                     | transcription elongation factor SPT6                    | CcLG07:9054957:9064476:1        | C                                        |                             |   |
|                                                   |                                 | inorganic phosphate transporter                         | CcLG09:4783671:4785284:1        | C                                        |                             |   |
|                                                   |                                 | odr-4 protein                                           | Scaffold000248:268146:273700:1  | C                                        |                             |   |
|                                                   |                                 | serine/threonine-protein kinase                         | Scaffold000258:159409:161928:1  | C                                        |                             |   |
|                                                   |                                 | polygalacturonase                                       | CcLG02:30091312:30103572:-1     | C                                        |                             |   |
| 161                                               | cca-miR161a                     | polygalacturonase                                       | CcLG02:30091312:30103572:-1     | C                                        |                             |   |
| 162                                               | cca-miR162d                     | PAZ protein                                             | CcLG03:29072965:29085159:-1     | C                                        |                             |   |
| 164                                               | cca-miR164e                     | NAC domain protein                                      | CcLG10:7293059:7297863:-1       | C                                        |                             |   |
| 167                                               | cca-miR167g                     | neutral ceramidase                                      | CcLG02:15573029:15580287:1      | T                                        |                             |   |
|                                                   |                                 | xyloglucan glycosyltransferase 4                        | Scaffold130637:32383:35122:1    | T                                        |                             |   |
| 169                                               | cca-miR169i                     | auxin-independent growth promoter protein               | CcLG01:9584030:9589068:-1       | C                                        |                             |   |
| 171                                               | cca-miR171n                     | scarecrow-like protein                                  | Scaffold000111:311133:313171:1  | C                                        |                             |   |
|                                                   |                                 | F-box protein                                           | Scaffold000054:76772:79124:1    | C                                        |                             |   |
|                                                   |                                 | mitochondrial voltage-dependent anion-selective channel | Scaffold000205:513784:517555:1  | C                                        |                             |   |
| 172                                               | cca-miR172b                     | MYB transcription factor                                | CcLG02:33461696:33462918:-1     | C                                        |                             |   |
|                                                   |                                 | callose synthase catalytic subunit                      | CcLG07:18903779:18928314:-1     | C                                        |                             |   |
|                                                   |                                 | glycosyl transferase                                    | CcLG07:18903779:18928314:-1     | C                                        |                             |   |
|                                                   |                                 | callose synthase 3                                      | Scaffold000310:304308:326141:1  | C                                        |                             |   |
|                                                   |                                 | ethylene-responsive transcription factor                | CcLG03:18195240:18197646:1      | C                                        |                             |   |
| 393                                               | cca-miR393a                     | floral homeotic protein APETALA 2                       | Scaffold132991:185259:188160:1  | C                                        |                             |   |
|                                                   |                                 | proline-rich protein APG                                | CcLG11:2735785:2737321:1        | C                                        |                             |   |
| 394                                               | cca-miR393d                     | zinc finger protein                                     | CcLG11:2735785:2737321:1        | C                                        |                             |   |
|                                                   |                                 | transport inhibitor response 1 protein                  | CcLG11:14918693:14921086:1      | C                                        |                             |   |
| 396                                               | cca-miR396b                     | F-box protein                                           | CcLG01:1344304:1347323:-1       | C                                        |                             |   |
|                                                   |                                 | WD repeat-containing protein                            | CcLG02:25748089:25764830:-1     | C                                        |                             |   |
| 397                                               | cca-miR396e                     | cytokinin dehydrogenase                                 | Scaffold000032:188976:191574:-1 | C                                        |                             |   |
|                                                   |                                 | peptidyl-prolyl cis-trans isomerase G                   | Scaffold130593:14661:23466:1    | C                                        |                             |   |
|                                                   |                                 | growth-regulating factor                                | CcLG03:20414775:20417437:1      | C                                        |                             |   |
| 403                                               | cca-miR403a                     | laccase/diphenol oxidase family protein                 | CcLG04:3250553:3253995:1        | C                                        |                             |   |
| 414                                               | cca-miR414a                     | phytochrome E                                           | CcLG06:3951623:3957773:-1       | T                                        |                             |   |
|                                                   |                                 | Root primordium defective protein                       | CcLG01:11884617:11886176:1      | C                                        |                             |   |
|                                                   |                                 | ATP-dependent helicase                                  | CcLG02:11525057:11530452:-1     | C                                        |                             |   |
|                                                   |                                 | rho GTPase-activating protein                           | CcLG03:28864752:28867674:1      | C                                        |                             |   |
|                                                   |                                 | beta-D-xylosidase                                       | CcLG06:13458102:13462914:-1     | C                                        |                             |   |
|                                                   |                                 | cytochrome P450 71A6                                    | CcLG08:7455540:7459552:-1       | C                                        |                             |   |
|                                                   |                                 | NAC domain-containing protein                           | CcLG09:8257941:8258846:-1       | C                                        |                             |   |
|                                                   |                                 | double-strand break repair protein Mre11                | CcLG10:5253626:5262725:1        | C                                        |                             |   |
|                                                   |                                 | silencing protein 10                                    | Scaffold125962:147152:153651:-1 | C                                        |                             |   |
|                                                   |                                 | phosphatase 2A regulatory A subunit                     | Scaffold136694:16816:25260:1    | C                                        |                             |   |
|                                                   |                                 | cyclin-D1                                               | CcLG01:17287066:17289970:1      | C                                        |                             |   |
|                                                   |                                 | 419                                                     | cca-miR419a                     | D-lactate/NADH dehydrogenase             | CcLG01:4371421:4377385:-1   | C |
|                                                   |                                 | 477                                                     | cca-miR477c                     | sequence independent translocase protein | CcLG02:32810955:32813695:-1 | C |
|                                                   |                                 |                                                         |                                 | WRKY transcription factor 53             | CcLG10:3007026:3008574:1    | C |
| ATP-dependent RNA helicase                        | CcLG05:1409592:1419402:1        |                                                         |                                 | C                                        |                             |   |
| eukaryotic translation initiation factor 3        | CcLG11:41653935:41657857:1      |                                                         |                                 | C                                        |                             |   |
| Unusual Floral Organs Protein                     | Scaffold000118:512791:514107:-1 |                                                         |                                 | C                                        |                             |   |
| GPI mannosyltransferase 3                         | Scaffold130498:15029:15510:1    |                                                         |                                 | C                                        |                             |   |
| Xyloglucan endotransglycosylase                   | Scaffold132287:35064:36911:1    |                                                         |                                 | C                                        |                             |   |
| auxin response factor 9                           | Scaffold137159:80177:85434:-1   |                                                         |                                 | C                                        |                             |   |
| 3-beta-hydroxysteroid-dehydrogenase/decarboxylase | Scaffold126003:17943:24621:-1   |                                                         |                                 | T                                        |                             |   |
| indole-3-acetic acid-amido synthetase             | Scaffold132135:703428:705415:-1 |                                                         |                                 | T                                        |                             |   |
| cca-miR482b                                       | clathrin assembly protein       |                                                         |                                 | Scaffold135491:186958:189115:-1          | C                           |   |
| 482                                               | cca-miR482e                     |                                                         |                                 | peptide/nitrate transporter              | CcLG11:41612792:41615296:-1 | C |
|                                                   |                                 |                                                         |                                 | arginine-tRNA ligase                     | CcLG08:725442:733184:1      | C |
| 821                                               | cca-miR821c                     | structural maintenance of chromosomes protein 2         | CcLG04:11810131:11821324:-1     | C                                        |                             |   |
|                                                   |                                 | E3 ubiquitin-protein ligase HOS1                        | CcLG06:21102603:21109427:1      | C                                        |                             |   |
|                                                   |                                 | E3 ubiquitin-protein ligase UPL1                        | CcLG07:6362019:6370016:1        | C                                        |                             |   |
|                                                   |                                 | transcriptional adapter ADA2                            | CcLG08:15009653:15014197:-1     | C                                        |                             |   |
|                                                   |                                 | pentatricopeptide repeat-containing protein             | Scaffold132622:400224:402881:1  | C                                        |                             |   |
| 829                                               | cca-miR829b                     | ATP-dependent DNA helicase Q                            | Scaffold132470:30658:41480:1    | T                                        |                             |   |
| 831                                               | cca-miR831a                     | pentatricopeptide repeat-containing protein             | Scaffold135185:54668:57142:1    | C                                        |                             |   |
|                                                   |                                 | aminoacyl tRNA synthase                                 | CcLG04:752969:757106:-1         | C                                        |                             |   |
|                                                   |                                 | trigger factor protein TIG                              | CcLG10:13331086:13336135:1      | C                                        |                             |   |
|                                                   |                                 | protein YLS7                                            | CcLG11:7212783:7216281:-1       | C                                        |                             |   |
|                                                   |                                 | 3-deoxy-manno-octulosonate cytidyltransferase           | Scaffold000327:486465:492097:-1 | C                                        |                             |   |
|                                                   |                                 | glycosyltransferase                                     | Scaffold132135:843262:847077:-1 | C                                        |                             |   |

|      |              |                                                        |                                 |   |
|------|--------------|--------------------------------------------------------|---------------------------------|---|
| 835  | cca-miR835a  | trichohyalin                                           | CcLG02:16378094:16379350:1      | C |
| 837  | cca-miR837a  | aldose 1-epimerase family protein                      | CcLG11:40584336:40590799:-1     | C |
|      | cca-miR837b  | transcription factor GTE1                              | CcLG11:13097278:13111154:1      | C |
|      |              | heat shock protein binding protein                     | CcLG11:19896716:19902951:1      | C |
| 862  | cca-miR862a  | rho GTPase-activating protein                          | Scaffold135531:38311:51604:-1   | C |
| 900  | cca-miR900a  | NLP4 protein                                           | Scaffold000231:269862:274018:-1 | C |
| 902  | cca-miR902a  | cellulose synthase protein                             | Scaffold134655:13066:19257:-1   | C |
|      |              | cleavage and polyadenylation specificity factor        | CcLG08:5553001:5580949:-1       | C |
|      |              | CLIP-associated protein                                | CcLG03:17543571:17557611:1      | C |
|      |              | DNA-directed RNA polymerase                            | Scaffold000161:43850:44041:1    | C |
|      |              | flocculation protein                                   | Scaffold000372:152417:155253:-1 | C |
|      |              | mediator of RNA polymerase II transcription subunit 16 | CcLG08:17793318:17808057:1      | C |
|      |              | methyltransferase PMT2                                 | Scaffold000347:263040:266358:1  | C |
|      |              | polygalacturonase/glycoside hydrolase family protein   | CcLG03:26708695:26711201:-1     | C |
|      |              | putative retrotransposon protein                       | Scaffold136189:143:757:1        | C |
|      |              | RNA polymerase beta chain                              | Scaffold000330:570140:570331:1  | C |
|      |              | secretory protein                                      | Scaffold132952:122973:124896:1  | C |
|      |              | tyrosine-phosphorylation-regulated kinase 4            | Scaffold136185:6650:10901:1     | C |
|      |              | U-box protein                                          | CcLG01:1560356:1564234:1        | C |
| 1023 | cca-miR1023b | pre-mRNA processing protein PRP39                      | CcLG02:26505771:26508921:-1     | T |
| 1027 | cca-miR1027a | ABC transporter G family member 18                     | CcLG05:355370:358456:-1         | C |
|      |              | potassium transporter                                  | CcLG09:2184482:2189607:1        | C |
|      | cca-miR1027b | aldehyde dehydrogenase                                 | Scaffold133322:331285:335090:-1 | C |
| 1030 | cca-miR1030a | copper-transporting ATPase                             | CcLG06:22426668:22434984:1      | C |
|      | cca-miR1030b | putative clathrin assembly protein                     | CcLG09:9384026:9392939:1        | C |
| 1078 | cca-miR1078e | mitochondrial fission protein ELM1                     | Scaffold128870:464100:467149:-1 | C |
| 1088 | cca-miR1088a | K protein                                              | Scaffold000124:106540:106734:-1 | C |
| 1134 | cca-miR1134b | GDSL esterase/lipase                                   | Scaffold130267:548944:554966:-1 | C |
| 1435 | cca-miR1435a | NAD-dependent aldehyde dehydrogenase                   | CcLG10:1640002:1643094:-1       | C |
|      |              | pentatricopeptide repeat-containing protein            | Scaffold126590:136872:138020:1  | C |
|      | cca-miR1435c | 7-methylxanthosine synthase                            | Scaffold127472:100881:112472:2  | C |
|      |              | elongation factor EF-2                                 | Scaffold129653:21989:24842:-1   | T |
|      |              | kinase protein                                         | Scaffold000362:101258:104013:1  | C |
|      |              | kinesin-like protein KIN12B                            | CcLG01:1228874:1235763:1        | T |
|      |              | Phospholipase D/Transphosphatidylase                   | CcLG02:25456464:25467614:-1     | C |
|      |              | protein HOTHEAD                                        | CcLG02:30769668:30771588:1      | C |
|      |              | protein SCO1 homolog 2                                 | Scaffold134281:55862:58640:-1   | C |
|      |              | U-box domain-containing protein                        | CcLG07:10490493:10493800:1      | C |
| 1446 | cca-miR1446a | carbon catabolite repressor protein 4                  | CcLG08:2887474:2891937:1        | C |
| 1507 | cca-miR1507a | disease resistance protein At3g14460-like              | CcLG06:21182896:21186618:1      | T |
|      |              | resistance protein KR4                                 | Scaffold134207:164276:167133:1  | T |
| 1508 | cca-miR1508b | pentatricopeptide repeat-containing protein            | CcLG10:15216717:15221039:1      | C |
| 1510 | cca-miR1510a | endo-1,4-beta-mannanase                                | CcLG03:26540039:26542746:-1     | C |
| 1521 | cca-miR1521a | ABC transporter B family member 9/ABC9                 | Scaffold127986:4869:10459:-1    | C |
|      |              | peroxisomal ABC transporter                            | Scaffold132375:20324:35909:-1   | C |
|      | cca-miR1521c | zeaxanthin epoxidase                                   | CcLG06:18193158:18202979:1      | C |
|      |              | cation-chloride cotransporter                          | Scaffold000142:194216:218701:1  | C |
| 1522 | cca-miR1522a | aldehyde dehydrogenase                                 | CcLG08:3018563:3022692:-1       | C |
|      | cca-miR1522e | alkaline alpha-galactosidase                           | CcLG03:14864196:14868716:-1     | C |
| 1533 | cca-miR1533a | MORN repeat-containing protein                         | Scaffold132391:229162:232066:-1 | C |
| 1535 | cca-miR1535a | beta-galactosidase                                     | CcLG07:1016589:1021151:1        | C |
|      |              | monocopper oxidase precursor family protein            | CcLG11:17130562:17134309:-1     | C |
| 2055 | cca-miR2055a | phospholipid/glycerol acyltransferase family protein   | Scaffold135129:256685:260515:-1 | C |
| 2079 | cca-miR2079a | ankyrin repeat-containing protein                      | CcLG03:18998712:19002905:-1     | C |
|      |              | exocyst complex component EXO70A1                      | Scaffold132955:112233:122776:1  | T |
| 2093 | cca-miR2093a | chaperone activity of bcl complex                      | CcLG11:41744366:41752211:1      | C |
|      |              | sucrose nonfermenting 4/SNF4 protein                   | CcLG11:46555609:46562180:-1     | C |
| 2595 | cca-miR2595b | NIPA protein                                           | CcLG10:4039818:4044783:1        | C |
| 2628 | cca-miR2628a | RNA pseudouridine synthase                             | CcLG02:28647860:28654118:-1     | C |
|      |              | WAT1-related protein                                   | CcLG08:19239178:19241414:1      | T |
|      | cca-miR2628b | E3 ubiquitin-protein ligase                            | CcLG03:19387849:19400066:1      | C |
|      |              | abscisic acid-activated protein kinase                 | Scaffold132224:117996:122447:-1 | C |
| 2655 | cca-miR2655b | RF1 protein (chloroplast)                              | Scaffold136542:14017:19494:-1   | C |
|      |              | BPI/LBP family protein                                 | Scaffold130267:36097:43326:1    | C |
|      |              | adenosine triphosphatase B subunit                     | Scaffold134437:122716:128312:1  | C |
| 2665 | cca-miR2665a | ABC transporter B family protein                       | CcLG08:496829:509251:-1         | C |
|      | cca-miR2665b | Glycosyltransferase                                    | CcLG02:15561618:15564364:-1     | C |
| 2673 | cca-miR2673a | 2-phytyl-1,4-beta-naphthoquinone methyltransferase     | CcLG06:10532659:10535782:-1     | C |
|      |              | 3-deoxy-manno-octulosonate cytidyltransferase          | Scaffold000327:486465:492097:-1 | C |
|      |              | eukaryotic translation initiation factor 3f            | CcLG01:3020629:3024260:-1       | C |
|      |              | LRR receptor protein kinase                            | Scaffold000401:221975:225217:1  | C |

|      |              |                                                                                   |                                 |   |
|------|--------------|-----------------------------------------------------------------------------------|---------------------------------|---|
|      |              | phytol kinase 3                                                                   | Scaffold132340:294171:297137:-1 | C |
|      |              | protoheme IX farnesyltransferase                                                  | Scaffold000310:193874:199423:-1 | C |
|      |              | U-box domain-containing protein                                                   | Scaffold132083:148223:150983:1  | C |
|      |              | UDP-N-acetylglucosamine--dolichyl-phosphate N-acetylglucosaminephosphotransferase | CcLG02:17602308:17606524:1      | C |
|      | cca-miR2673b | Acyl-CoA-binding domain-containing protein                                        | Scaffold126139:20750:31005:1    | C |
|      |              | anion transporter 3                                                               | Scaffold127360:258153:262292:1  | C |
|      |              | cellulose synthase                                                                | Scaffold127746:232183:236297:-1 | C |
|      |              | glycine-rich protein                                                              | Scaffold000015:191597:192187:1  | C |
|      |              | mitochondrial chaperone BCS1-B                                                    | CcLG11:40175842:40177404:1      | C |
|      |              | osmotic stress-activated protein kinase                                           | Scaffold126970:174571:177238:-1 | C |
|      |              | serine/threonine-protein kinase ndrB                                              | CcLG08:10528707:10540651:1      | C |
|      |              | SPLa/RYanodine receptor (SPRY) domain protein                                     | CcLG04:137425:147491:-1         | C |
|      |              | Two-component response regulator ARR2 family protein                              | CcLG11:44913305:44916607:-1     | C |
| 2676 | cca-miR2676b | alternative NAD(P)H-ubiquinone oxidoreductase C1                                  | Scaffold130021:31887:37581:-1   | T |
| 2873 | cca-miR2873a | cation/calcium exchanger                                                          | Scaffold133616:70266:72002:1    | C |
| 2931 | cca-miR2931a | cysteine--tRNA ligase                                                             | CcLG03:11605341:11609429:1      | C |
|      | cca-miR2931b | glucose-6-phosphate 1-dehydrogenase                                               | CcLG11:2682076:2686693:1        | C |
|      |              | serine/threonine-protein kinase                                                   | CcLG01:5693166:5703987:1        | T |
|      |              | cyclin-T1-4                                                                       | CcLG02:32239158:3224189:-1      | T |
| 3434 | cca-miR3434a | molybdopterin biosynthesis protein                                                | CcLG03:20271123:20280574:-1     | C |
|      |              | 6-phosphofructokinase 3                                                           | CcLG08:801502:805732:1          | C |
| 3513 | cca-miR3513d | cyclic nucleotide-gated ion channel                                               | CcLG11:541032:546042:-1         | C |
| 3629 | cca-miR3629a | clathrin heavy chain                                                              | Scaffold132340:110088:122837:1  | C |
| 3950 | cca-miR3950a | leucine-rich repeat family protein                                                | CcLG07:9349543:9351744:1        | C |
|      |              | protein kinase                                                                    | CcLG07:9349543:9351744:1        | C |
|      |              | beta-xylosidase/alpha-L-arabinofuranosidase                                       | CcLG08:19034702:19039067:1      | C |
| 3951 | cca-miR3951b | clathrin interactor 1                                                             | CcLG07:18185244:18186836:-1     | C |
| 3979 | cca-miR3979a | FAD-linked oxidoreductase 1                                                       | Scaffold000209:71975:73564:-1   | C |
|      |              | fructose-1,6-bisphosphate aldolase                                                | CcLG03:18987503:18989889:-1     | C |
|      |              | phosphotransfer protein                                                           | CcLG11:47160299:47161409:-1     | C |
|      |              | polygalacturonase                                                                 | CcLG02:23963864:23971819:-1     | C |
|      |              | subtilisin-like protease                                                          | CcLG06:21911440:21920194:1      | C |
|      |              | xyloglucan endotransglucosylase                                                   | Scaffold117297:205:1251:-1      | C |
| 4245 | cca-miR4245a | golgin candidate 1                                                                | Scaffold136224:32824:39987:1    | C |
| 4413 | cca-miR4413b | ATP-dependent RNA helicase                                                        | Scaffold134367:16447:26548:-1   | C |
| 4415 | cca-miR4415a | ascorbate oxidase                                                                 | Scaffold132188:31901:39194:1    | C |
| 5031 | cca-miR5031a | phosphatase                                                                       | CcLG02:8302252:8305006:-1       | C |
|      |              | linoleate 13S-lipoxygenase 2-1                                                    | Scaffold133415:396297:402103:1  | C |
| 5057 | cca-miR5057a | TSL-kinase interacting protein                                                    | Scaffold130090:30952:38177:-1   | T |
|      | cca-miR5057b | ataxin-2 homolog                                                                  | CcLG10:856232:864999:-1         | C |
| 5139 | cca-miR5139a | protease Do                                                                       | CcLG11:26845523:26850611:1      | C |
| 5140 | cca-miR5140a | tyrosine kinase family protein                                                    | CcLG06:16311492:16322056:1      | C |
| 5185 | cca-miR5185b | 2-alkenal reductase (NADP(+)-dependent)                                           | Scaffold129254:35346:38243:1    | C |
|      |              | golgin subfamily B member                                                         | CcLG02:3438561:3444232:1        | C |
|      |              | ubiquitin conjugating enzyme J2                                                   | Scaffold137793:206701:209137:1  | T |
|      | cca-miR5185c | exosome complex component RRP4                                                    | CcLG03:16273064:16274885:-1     | C |
| 5201 | cca-miR5201a | alpha-amylase                                                                     | Scaffold132748:156518:159521:1  | T |
| 5237 | cca-miR5237a | outer membrane OMP85 family protein                                               | CcLG10:1515557:1523519:-1       | C |
| 5240 | cca-miR5240b | gibberellin 3-beta-dioxygenase                                                    | CcLG01:16162168:16163492:1      | C |
|      |              | kinesin-like protein KIN12B                                                       | CcLG10:13553584:13559724:-1     | C |
| 5257 | cca-miR5257a | plastidic glucose transporter 2                                                   | CcLG06:19509653:19514823:-1     | C |
| 5264 | cca-miR5264a | chaperonin containing t-complex protein                                           | Scaffold130382:156006:160943:-1 | C |
|      |              | galactinol--sucrose galactosyltransferase                                         | CcLG11:10790201:10794069:-1     | C |
|      |              | peroxidase                                                                        | CcLG03:15778822:15780866:1      | C |
| 5265 | cca-miR5265a | polygalacturonase                                                                 | CcLG08:13914669:13916836:1      | T |
|      |              | somatic embryogenesis receptor kinase                                             | Scaffold000116:238231:244745:-1 | T |
| 5369 | cca-miR5369a | ATP-dependent RNA helicase                                                        | Scaffold000123:182048:186102:-1 | C |
|      |              | auxin influx carrier protein                                                      | CcLG11:1015047:1020697:1        | C |
|      |              | dehydrogenase/reductase SDR family member                                         | CcLG03:8256591:8262745:-1       | C |
|      |              | double-strand break repair protein Mre11                                          | CcLG10:5253626:5262725:1        | T |
|      |              | LRR receptor kinase                                                               | CcLG01:1777521:1783875:1        | C |
|      |              | probable anion transporter                                                        | Scaffold133847:81097:82392:1    | C |
|      |              | proteasome assembly chaperone                                                     | CcLG06:9580481:9583958:1        | C |
|      |              | sucrose-phosphate synthase family protein                                         | CcLG02:14038336:14043740:1      | C |
|      |              | sugar transport protein                                                           | CcLG06:22166309:22168173:1      | T |
|      |              | ubiquitin carboxyl-terminal hydrolase                                             | CcLG10:7081287:7092472:1        | C |
|      |              | UDP-galactose/UDP-glucose transporter                                             | CcLG04:2654307:2659352:-1       | C |
| 5382 | cca-miR5382a | ADH-like UDP-glucose dehydrogenase                                                | Scaffold000277:115342:118954:1  | C |
|      |              | calmodulin-domain kinase CDPK protein                                             | CcLG02:17066188:17069151:1      | C |

|      |              |                                                      |                                 |   |
|------|--------------|------------------------------------------------------|---------------------------------|---|
|      |              | casein kinase                                        | CcLG08:12834647:12840209:-1     | T |
|      |              | cellulose synthase protein                           | CcLG10:12769748:12777580:-1     | C |
|      |              | coatomer delta subunit                               | CcLG04:3746233:3751099:1        | C |
|      |              | cyclic nucleotide-gated ion channel 4                | CcLG10:5228541:5237548:-1       | T |
|      |              | E3 ubiquitin-protein ligase XBAT31                   | CcLG10:2079989:2082656:-1       | C |
|      |              | endo-1,3;1,4-beta-D-glucanase                        | CcLG11:47431665:47435640:-1     | C |
|      |              | exocyst complex component SEC15B                     | Scaffold127746:484514:486910:1  | C |
|      |              | formyltetrahydrofolate deformylase                   | CcLG11:16832787:16836268:1      | C |
|      |              | inositol pentakisphosphate 2-kinase                  | Scaffold136554:266300:269661:-1 | C |
|      |              | LEC14B homolog                                       | CcLG02:8158076:8162678:1        | C |
|      |              | MATE efflux family protein                           | Scaffold133201:166284:171831:-1 | C |
|      |              | monothiol glutaredoxin-S2 protein                    | CcLG08:17036326:17036634:1      | C |
|      |              | Serine/Threonine-kinase                              | Scaffold135298:369518:371066:-1 | C |
|      |              | vacuolar protein sorting-associated protein          | CcLG04:7149224:7160085:1        | C |
|      |              | zinc-binding alcohol dehydrogenase family protein    | Scaffold000277:115342:118954:1  | C |
| 5523 | cca-miR5523a | apocytochrome b6                                     | CcLG10:14146632:14147042:1      | C |
| 5721 | cca-miR5721a | glutamate dehydrogenase                              | CcLG11:2502294:2509795:1        | C |
|      |              | NADP-specific glutamate dehydrogenase                | CcLG10:299207:307943:-1         | C |
|      |              | phospholipid-transporting ATPase                     | Scaffold129818:388693:399035:1  | C |
|      | cca-miR5721b | dynammin-related protein 3A                          | CcLG09:9091914:9101513:1        | T |
|      |              | transcriptional regulator ATRX                       | CcLG02:26474610:26501820:1      | C |
| 5770 | cca-miR5770a | copper amino oxidase                                 | CcLG11:47344011:47346871:-1     | C |
| 6034 | cca-miR6034a | phosphate carrier protein                            | CcLG11:15770855:15773041:1      | C |
| 6169 | cca-miR6169a | mannosyl-oligosaccharide 1,2-alpha-mannosidase       | Scaffold000063:150956:157506:-1 | T |
|      | cca-miR6169b | transcription factor bHLH48                          | CcLG11:39402312:39408124:-1     | C |
| 6196 | cca-miR6196a | metal transporter Nramp2                             | CcLG03:14090772:14093942:1      | C |
|      |              | pre-mRNA-splicing factor ISY1                        | CcLG10:14898953:14899855:-1     | C |
| 6202 | cca-miR6202a | 26S proteasome regulatory subunit RPN13              | CcLG05:1460314:1467699:1        | C |
|      |              | elongation defective 1 protein/ELD1 protein          | Scaffold000254:66943:73616:-1   | T |
| 6232 | cca-miR6232b | TFIIH basal transcription factor complex subunit     | CcLG09:4004287:4015063:1        | C |
| 6281 | cca-miR6281a | lysine-tRNA ligase                                   | Scaffold000401:243611:245030:1  | C |
|      | cca-miR6281b | 15-cis-zeta-carotene isomerase                       | CcLG01:1295933:1299525:1        | C |
| 6288 | cca-miR6288e | pre-mRNA processing protein PRP39                    | CcLG02:26505771:26508921:-1     | C |
| 6464 | cca-miR6464b | GDSL esterase/lipase At2g04570                       | CcLG02:12004369:12024990:1      | C |
| 6470 | cca-miR6470a | sugar transport protein 5                            | CcLG02:5765115:5768640:1        | C |
| 7535 | cca-miR7535b | DEAD-box ATP-dependent RNA helicase 29               | Scaffold128595:3356:9618:1      | C |
|      |              | GDSL-like lipase/acylhydrolase                       | CcLG11:44545369:44546781:-1     | C |
|      |              | MLO protein                                          | Scaffold127160:11749:18351:1    | C |
|      |              | NPH3 family protein                                  | CcLG03:22579001:22582747:-1     | C |
|      |              | pentatricopeptide repeat-containing protein          | CcLG09:78147:81913:-1           | C |
|      |              | RIN4c protein                                        | Scaffold000028:144509:145446:1  | C |
|      |              | sucrose synthase 3                                   | Scaffold127746:354477:359622:1  | C |
|      |              | WD repeat-containing protein 36                      | CcLG08:374039:382811:-1         | C |
| 7540 | cca-miR7540a | isoleucine--tRNA ligase                              | CcLG04:1667045:1682520:-1       | C |
| 7545 | cca-miR7545a | BPI/LBP family protein                               | Scaffold130267:36097:43326:1    | C |
|      |              | DNA helicase INO80                                   | CcLG02:17740204:17756476:1      | T |
|      |              | pentatricopeptide repeat containing protein          | CcLG02:15111854:15114454:-1     | C |
| 7699 | cca-miR7699b | chromatin remodeling factor                          | CcLG02:32342892:32352993:-1     | C |
| 7736 | cca-miR7736a | polygalacturonase/glycoside hydrolase family protein | CcLG11:41942310:41946957:-1     | C |
| 7776 | cca-miR7776b | non-specific phospholipase C4                        | CcLG03:4388024:4390367:1        | C |
| 8040 | cca-miR8040a | 1-aminocyclopropane-1-carboxylate oxidase            | CcLG10:18885090:18887441:-1     | C |
| 8041 | cca-miR8041c | cyclic nucleotide-gated channel C family protein     | CcLG02:1052915:1058746:1        | T |
| 8123 | cca-miR8123a | 2-deoxymugineic-acid 2-dioxygenase protein           | CcLG02:11197795:11200386:1      | C |
|      |              | 40S ribosomal protein S3                             | CcLG02:21559501:21561204:1      | C |
|      |              | 40S ribosomal protein S8                             | Scaffold000287:357780:360103:1  | C |
|      |              | ARM repeat protein                                   | CcLG02:32278504:32285529:1      | C |
|      |              | aspartokinase-homoserine dehydrogenase               | CcLG11:24215052:24225901:1      | T |
|      |              | auxin efflux carrier                                 | CcLG06:4104775:4108094:-1       | C |
|      |              | chaperone protein ClpD                               | CcLG03:4123233:4130463:-1       | C |
|      |              | chytocrome oxidase subunit 1                         | Scaffold128325:14609:16192:1    | C |
|      |              | divalent metal transporter 1                         | Scaffold132135:685373:688399:-1 | C |
|      |              | D-lactate dehydrogenase 2                            | CcLG06:18852818:18862993:-1     | C |
|      |              | DUF642 family protein                                | CcLG03:23267975:23269703:-1     | C |
|      |              | elongation factor EF-2                               | Scaffold126898:492690:495473:-1 | C |
|      |              | exocyst complex component EXO70A1                    | CcLG02:16898494:16912381:-1     | C |
|      |              | exosome complex exonuclease RRP41                    | Scaffold000329:81511:83769:-1   | C |
|      |              | glutamate decarboxylase                              | Scaffold128736:97823:103613:-1  | C |
|      |              | inositol or phosphatidylinositol kinase              | CcLG06:18420408:18448990:-1     | C |
|      |              | linoleate 9S-lipoxygenase                            | CcLG02:25046692:25052592:-1     | C |
|      |              | LRR receptor kinase                                  | CcLG01:1777521:1783875:1        | C |
|      |              | LRR ribonuclease inhibitor domain protein            | CcLG06:11621481:11629072:-1     | C |

|  |                                              |                                 |   |
|--|----------------------------------------------|---------------------------------|---|
|  | MDR-like p-glycoprotein                      | Scaffold000388:122264:131684:-1 | C |
|  | Meiotic coiled-coil protein                  | Scaffold134084:5282:7548:1      | C |
|  | Na <sup>+</sup> /H <sup>+</sup> antiporter   | CcLG02:35240099:35245268:-1     | C |
|  | pectin methyltransferase QUA2                | Scaffold000111:20270:27658:-1   | T |
|  | plant/F20M13-60 protein                      | CcLG05:2468775:2474206:1        | C |
|  | plastidal glycolate/glycerate translocator 1 | CcLG11:5885953:5890268:-1       | C |
|  | polygalacturonase                            | CcLG11:44019815:44026363:-1     | C |
|  | potassium transporter 10                     | CcLG08:11736547:11749120:1      | C |
|  | protein kinase ANXUR2                        | CcLG03:27272540:27274891:-1     | T |
|  | pumilio homolog 5                            | CcLG08:12253455:12259773:-1     | C |
|  | Root Primordium Defective protein 1          | Scaffold000350:95394:96590:-1   | C |
|  | serine/threonine-protein kinase              | CcLG11:35397402:35399557:-1     | T |
|  | U1 small nuclear ribonucleoprotein C         | CcLG03:24484247:24486312:-1     | C |
|  | ubiquitin-protein ligase                     | Scaffold137753:42638:58020:-1   | C |
|  | vascular associated death 1/VAD1             | CcLG10:5989092:6003860:-1       | C |
