# Supplementary material for: Genome-wide identification of miRNAs and lncRNAs in Cajanus cajan
Source: PubMed Central journal article supplement (PMC5688659; doi:10.1186/s12864-017-4232-2), 2017-11-15
Supplement: 12864_2017_4232_MOESM3_ESM.pdf [file 12864_2017_4232_MOESM3_ESM.pdf]

Table S3: miRNAs targeting lncRNAs in *C. cajan*.

| miRNA        | lncRNA         | Mode of action <sup>a</sup> |
|--------------|----------------|-----------------------------|
| cca-miR1027a | cca-lnc-017006 | T                           |
| cca-miR1030a | cca-lnc-019164 | C                           |
| cca-miR1046a | cca-lnc-005268 | C                           |
| cca-miR1171a | cca-lnc-020705 | C                           |
| cca-miR1171a | cca-lnc-013530 | C                           |
| cca-miR1217a | cca-lnc-013938 | C                           |
| cca-miR1435a | cca-lnc-012596 | C                           |
| cca-miR1435b | cca-lnc-008186 | C                           |
| cca-miR1516c | cca-lnc-015713 | C                           |
| cca-miR1522a | cca-lnc-020347 | T                           |
| cca-miR1522d | cca-lnc-019372 | C                           |
| cca-miR1525b | cca-lnc-012722 | T                           |
| cca-miR1527a | cca-lnc-003780 | C                           |
| cca-miR1527a | cca-lnc-003780 | C                           |
| cca-miR1527a | cca-lnc-012486 | C                           |
| cca-miR1527a | cca-lnc-011210 | C                           |
| cca-miR1527b | cca-lnc-017886 | C                           |
| cca-miR1533a | cca-lnc-002755 | C                           |
| cca-miR1535a | cca-lnc-020033 | C                           |
| cca-miR1535a | cca-lnc-008782 | C                           |
| cca-miR156e  | cca-lnc-013475 | C                           |
| cca-miR158b  | cca-lnc-020134 | C                           |
| cca-miR158b  | cca-lnc-016000 | T                           |
| cca-miR166k  | cca-lnc-019665 | T                           |
| cca-miR172b  | cca-lnc-017211 | C                           |
| cca-miR172b  | cca-lnc-011665 | C                           |
| cca-miR2086a | cca-lnc-008610 | C                           |
| cca-miR2595b | cca-lnc-015903 | T                           |
| cca-miR2628a | cca-lnc-017394 | C                           |
| cca-miR2655b | cca-lnc-006786 | C                           |
| cca-miR2673a | cca-lnc-020793 | C                           |
| cca-miR2676c | cca-lnc-020471 | C                           |
| cca-miR2871a | cca-lnc-012842 | T                           |
| cca-miR2873a | cca-lnc-020153 | C                           |
| cca-miR2928a | cca-lnc-016198 | C                           |
| cca-miR3979a | cca-lnc-020255 | C                           |
| cca-miR3979a | cca-lnc-017415 | C                           |
| cca-miR3979a | cca-lnc-013326 | C                           |
| cca-miR3979a | cca-lnc-019676 | T                           |
| cca-miR400a  | cca-lnc-017788 | C                           |
| cca-miR403a  | cca-lnc-018818 | C                           |
| cca-miR403a  | cca-lnc-018612 | C                           |

|              |                |   |
|--------------|----------------|---|
| cca-miR403a  | cca-lnc-017177 | T |
| cca-miR408a  | cca-lnc-015064 | C |
| cca-miR408a  | cca-lnc-011014 | C |
| cca-miR414b  | cca-lnc-019797 | C |
| cca-miR419a  | cca-lnc-010405 | C |
| cca-miR4233a | cca-lnc-016911 | T |
| cca-miR4233a | cca-lnc-017063 | C |
| cca-miR4415a | cca-lnc-020197 | C |
| cca-miR477i  | cca-lnc-014684 | C |
| cca-miR482a  | cca-lnc-012486 | C |
| cca-miR482f  | cca-lnc-012915 | C |
| cca-miR5031c | cca-lnc-017254 | C |
| cca-miR5054b | cca-lnc-013756 | C |
| cca-miR5054b | cca-lnc-016844 | C |
| cca-miR5057b | cca-lnc-011832 | C |
| cca-miR5139a | cca-lnc-011400 | C |
| cca-miR5171a | cca-lnc-013581 | C |
| cca-miR5201a | cca-lnc-017751 | C |
| cca-miR5369a | cca-lnc-013037 | T |
| cca-miR5369a | cca-lnc-008186 | T |
| cca-miR5565a | cca-lnc-020693 | C |
| cca-miR6034a | cca-lnc-016088 | C |
| cca-miR6135a | cca-lnc-017621 | C |
| cca-miR6218b | cca-lnc-015007 | T |
| cca-miR6281a | cca-lnc-012181 | C |
| cca-miR6281a | cca-lnc-019771 | C |
| cca-miR6288b | cca-lnc-017689 | C |
| cca-miR7508a | cca-lnc-019354 | C |
| cca-miR7535a | cca-lnc-015025 | C |
| cca-miR7535b | cca-lnc-011922 | C |
| cca-miR8005b | cca-lnc-020078 | T |
| cca-miR8005b | cca-lnc-012903 | T |
| cca-miR8041c | cca-lnc-010853 | T |
| cca-miR8123a | cca-lnc-016125 | C |
| cca-miR8123a | cca-lnc-013395 | C |
| cca-miR8123a | cca-lnc-015310 | C |
| cca-miR821c  | cca-lnc-018892 | C |
| cca-miR829c  | cca-lnc-007774 | T |
| cca-miR845a  | cca-lnc-016517 | C |
| cca-miR845f  | cca-lnc-020453 | C |
| cca-miR845g  | cca-lnc-012311 | C |
| cca-miR854a  | cca-lnc-017321 | T |
| cca-miR854a  | cca-lnc-011677 | T |
| cca-miR859b  | cca-lnc-008709 | C |

|             |                |   |
|-------------|----------------|---|
| cca-miR902a | cca-lnc-015923 | C |
| cca-miR902a | cca-lnc-020282 | C |
| cca-miR902a | cca-lnc-018680 | T |
| cca-miR902a | cca-lnc-016568 | T |

<sup>a</sup>The mechanism of target inactivation: Cleavage(C) and Translational (T).
